# 1 Exploring the miRNA-mediated response to combined stresses 2 in melon plants

3

4 Pascual Villalba-Bermell<sup>1</sup>, Joan Marquez-Molins<sup>1</sup>, María-Carmen Marques<sup>1</sup>, Andrea G.  
5 Hernandez-Azurdia<sup>1</sup>, Julia Corell-Sierra<sup>1</sup>, Belén Picó<sup>2</sup>, Antonio J. Monforte<sup>3</sup>, Santiago F.  
6 Elena<sup>1,4</sup>, and Gustavo G. Gomez<sup>1</sup>.

7

8

9 <sup>1</sup> Instituto de Biología Integrativa de Sistemas (I<sup>2</sup>SysBio), Consejo Superior de Investigaciones  
10 Científicas (CSIC) - Universitat de València (UV), Parc Científic UV, Catedrático Agustín  
11 Escardino 9, Paterna, 46980 Valencia, Spain.

12

13 <sup>2</sup> Instituto de Conservación y Mejora de la Agrodiversidad Valenciana (COMAV), Universitat  
14 Politècnica de València (UPV), CPI 8E, Avenida de los Naranjos s/n, 46022 Valencia, Spain.

15

16 <sup>3</sup> Instituto de Biología Molecular y Celular de Plantas (IBMCP), CSIC - UPV, CPI 8E, Avenida de  
17 los Naranjos s/n, 46022 Valencia, Spain.

18

19 <sup>4</sup> The Santa Fe Institute, 1399 Hyde Park Road, Santa Fe, NM 87501, USA.

20

## 21 Correspondence

22 Gustavo G. Gomez, Instituto de Biología Integrativa de Sistemas (I<sup>2</sup>SysBio), Consejo Superior de  
23 Investigaciones Científicas (CSIC) - Universitat de València (UV), Parc Científic UV, Catedrático  
24 Agustín Escardino 9, Paterna, 46980 Valencia, Spain.

25 Email: [gustavo.gomez@csic.es](mailto:gustavo.gomez@csic.es)

26

27

## 28 Running title

29 A new viewing in miRNA response to multiple stresses

30

31

## 32 Keywords

33 Crops production and climate change, miRNAs and stress response in *Cucumis melo*, RNA  
34 regulatory networks, RNA-seq and systems biology.

35

## 1 Abstract

2 Climate change has been associated with a higher incidence of combined adverse  
3 environmental conditions that can promote a significant decrease in crop productivity.  
4 However, knowledge on how a combination of stresses might affect plant development is still  
5 scarce. MicroRNAs (miRNAs) have been proposed as potential targets for improving crop-  
6 productivity. Here, we have combined deep-sequencing, computational characterization of  
7 responsive miRNAs and validation of their regulatory role in a comprehensive analysis of  
8 melon's response to several combinations of four stresses (cold, salinity, short day, and  
9 infection with a fungus). Twenty-two miRNA families responding to double and/or triple  
10 stresses were identified. The regulatory role of the differentially expressed miRNAs was  
11 validated by quantitative measurements of the expression of the corresponding target genes. A  
12 high proportion (ca. 60%) of these families (mainly highly conserved miRNAs targeting  
13 transcription factors) showed a non-additive response to multiple stresses in comparison with  
14 that observed under each one of the stresses individually. Among those miRNAs showing non-  
15 additive response to stress-combinations, most interactions were negative suggesting the  
16 existence of functional convergence in the miRNA-mediated response to combined stresses.  
17 Taken together, our results provide compelling evidences that the response to combined  
18 stresses cannot be easily predicted from the study individual stresses.  
19

## 1 1 INTRODUCTION

2 During their life cycle, plants are exposed to a wide array of adverse environmental  
3 conditions that, in general, limit their normal development and productivity. These  
4 complex interactions result in several stress situations that disturb the cell's  
5 homeostasis negatively affecting plant-growth. Consequently, stress-induced damages  
6 in productivity are the primary cause of extensive agricultural losses worldwide (Priya et  
7 al., 2019). Reduction in crop yield due to environmental variations has increased  
8 steadily over the last decades. In addition, several production models project a  
9 reduction in the yields of major agricultural crops in the future, mostly due to climatic  
10 changes (Rosenzweig et al., 2014).

11 Climate change, entailing shifts in temperature, precipitation and atmospheric  
12 composition, among other factors, represents a moving target for plant developmental  
13 adaptation. In parallel, environmental modifications can favor the development of new  
14 plant-pest and/or pathogens or increase the incidence levels of already existing ones.  
15 As a consequence of this complex environmental scenario, it is expected that combined  
16 abiotic and biotic stresses can affect plants at the level of molecular functions,  
17 developmental processes, morphological traits, and physiology, resulting in a significant  
18 decrease in crop production and quality (Gray & Brady, 2016; Morales-Castilla et al.,  
19 2020).

20 Multiples studies focused on plant responses to individual stresses have been  
21 carried out over the last years. However less attention has been paid to the effect that  
22 combinations of adverse environmental conditions might exert on plant development.  
23 In order to improve crop yield and to meet the growing challenges stemming from rapid  
24 population growth, extensive efforts are needed to understand the mechanisms  
25 underlying plant responses to simultaneous exposure to multiple stresses (Zhang &  
26 Sonnewald, 2017). Previous works have pointed out that studying stress conditions  
27 separately would not allow to infer the expected plant response to multiple stresses.  
28 Using *Arabidopsis thaliana* as experimental model, it was shown that the response to a  
29 combination of drought and heat was unique and could not be directly extrapolated  
30 from the plant response to each stress applied individually (Rizhsky et al., 2004; Suzuki  
31 et al., 2005; Rossel et al., 2007). Similar findings were also reported for a combination  
32 of heat and high light intensity in sunflower (Hewezi, Léger & Gentzbittel, 2008), and

1 heat and salinity in wheat (Keleş & Öncel, 2002). Consequently, plant response to  
2 combined adverse environmental conditions should be handled as a new state of stress  
3 that requires a novel conceptual viewpoint (Mittler & Blumwald, 2010).

4 In general, plants respond to stress conditions through a complex reprogramming  
5 of their transcriptional activities aiming to reduce the impact of stress on their  
6 physiological and cell homeostasis. Environmental variations have selected diverse  
7 responses among plant lineages, landraces and wild crops relatives. Studies on natural  
8 variations can provide novel insights into evolutionary processes modulating stress  
9 response (Meyers et al., 2008; Haak et al., 2017). Elucidation of how endogenous  
10 regulators and the environment interact during plant development is a long-standing  
11 grand challenge in modern biology as well as in crop breeding (Lovell et al., 2015).

12 MicroRNAs (miRNAs) play a versatile role as regulators of gene expression. Plant  
13 genes encoding miRNAs are transcribed by RNA polymerase II as primary transcripts  
14 harboring a fold back structure that is processed by DICER-LIKE 1 (DCL1) in a duplex (21  
15 or 22 nt in length) which once 2'-O-methylated by HEN1 is loaded into an AGO complex  
16 (Bartel, 2004; Bologna & Voinnet, 2014; Reis, Eamens & Waterhouse, 2015; Achkar,  
17 Cambiagno & Manavella, 2016). miRNAs regulate gene expression by means of  
18 sequences complementarity with both RNA and DNA targets (Song, Li, Cao & Qi, 2019).  
19 Their functions include modulation of a vast array of plant biological processes related  
20 to growth and development (Bologna & Voinnet, 2014), including the recovering of the  
21 plant-cell homeostasis during exposure to adverse environmental condition (Song et al.,  
22 2019; Xu et al., 2019). In addition, it has been recently described that the biogenesis  
23 and turnover of certain miRNAs is also susceptible to be controlled by external stimulus  
24 (Bustamante et al., 2018; Manavella, Yang & Palatnik, 2019). Indeed, it has been  
25 proposed that miRNAs are ideal targets to be manipulated to improve crop productivity  
26 (Tang & Chu, 2017; Xu et al., 2019). However, most of the described stress-responsive  
27 miRNAs come from rice and tomato, as very few miRNAs have been investigated in  
28 detail in other crops. Henceforth, additional efforts are needed to decipher the role of  
29 miRNA-mediated responses to adverse environmental conditions in other economically  
30 relevant crops (Tang & Chu, 2017).

31 Although, increasing evidences support the role of miRNAs as key modulators of  
32 plant response to both biotic (Sun, Niu & Fan, 2017; Xie et al., 2017; Brant & Budak,

1 2018) and abiotic stress conditions (Cervera-Seco et al., 2019; Wang et al., 2020; Cheng  
2 et al., 2021; Zhao et al., 2021), research focusing on elucidating the regulatory role of  
3 the miRNAs during exposure to combined adverse environmental conditions is still  
4 scarce (Xu et al., 2019) and only a few studies considering the effects of an unique  
5 combination of stresses have been addressed in soybean (Ning et al., 2019) and *A.*  
6 *thaliana* (Gupta, Patil, Qamar & Senthil-Kumar, 2020).

7 Melon (*Cucumis melo*) is one of the cucurbit crops with more economic impact.  
8 Melon has a high adaptability to warm and dry climates, so it can be a target crop to  
9 cope with the climate change threats. Previous genetic studies in cucurbits have been  
10 focused mainly in fruit quality and disease resistance (Gonzalo & Monforte 2017).  
11 However, the study of the response to combined stress conditions have not been  
12 thoroughly addressed in cucurbits. Consequently, there is a lack of consensus protocols,  
13 target traits and, therefore, identification of tolerant genotypes to develop efficiently  
14 resilient cultivars.

15 Here, we use deep-sequencing, computational approaches and specific miRNA-  
16 targets quantification to present a comprehensive functional analysis of miRNA  
17 expression profiles in response to one triple (cold, salinity and short day) and five  
18 double (cold and drought, cold and salinity, cold and short day, drought and salinity,  
19 and drought and infection with the fungus *Monosporascus cannonballus*) combinations  
20 of stress conditions in melon (*Cucumis melo*), a crop extensively cultivated in semi-arid  
21 regions worldwide. The analyzed stress conditions were coincident, in part, with those  
22 employed recently to infer the miRNA-mediated regulatory network of response to  
23 individual stresses in melon (Sanz-Carbonell et al., 2019; Sanz-Carbonell, Marques,  
24 Martinez & Gomez, 2020). The parallelism between both experimental approaches  
25 made possible to unambiguously analyze the effects that the combined adverse  
26 environmental conditions have on the accumulation of the stress-responsive miRNAs.

27

## 28 2 METHODS

### 29 2.1 Plant material, growth conditions, and stress treatments

30 Melon seeds of cv. Piel de Sapo were germinated in Petri dishes at 37 °C/48 h in  
31 darkness followed by 24 h/25 °C (16/8 light/darkness). Melon seedlings were sown in  
32 pots and maintained for 10 days under controlled conditions (28 °C/16 h light and 20

1 °C/8 h darkness). At day 11, plants were exposed to six stress-combined treatments  
2 (detailed in Table S1). At eleven days post-treatment, the first leaf under the apical end  
3 per plant was collected in liquid nitrogen and maintained at –80 °C until processing.  
4 Each analyzed sample corresponds to a pool of three treated plants. Three biological  
5 replicates were performed per treatment. Leaves recovered from non-treated plants  
6 were considered as controls.

7

## 8 **2.2 RNA extraction and small RNA (sRNA) purification and sequencing**

9 Total RNA was extracted from leaves (~0.1 g) recovered from treated and control melon  
10 as previously described (Sanz-Carbonell et al., 2019; Sanz-Carbonell, Marques, Martinez  
11 & Gomez, 2020). The low-molecular weight RNA (< 200 nt) fraction was enriched from  
12 total RNA using TOTAL-miRNA (miRNA isolation Kit, REAL) according to the  
13 manufacturer's instructions. Production and sequencing of the libraries were carried  
14 out by Novogene (<https://en.novogene.com>). Eighteen cDNA libraries were obtained by  
15 following Illumina's recommendations and sequenced in a HiSeq 2000 (Illumina)  
16 equipment. Adaptors and low-quality reads were trimmed by using the cutadapt  
17 software. For the sake of comparing the results generated in here with those obtained  
18 for single stresses, data previously obtained from melon plants exposed to identical  
19 single stress conditions for 11 days (Sanz-Carbonell et al., 2019) were also included in  
20 the study. Melon miRNA sequences used in this study have been submitted to the  
21 genomic repository SRA of the NCBI and are available in the BioProject (PRJNA741881).

22

## 23 **2.3 RT-qPCR assays**

24 To analyze the expression of target genes, total RNA (1.5 µg) was subjected to DNase  
25 treatment (EN0525, Thermo Scientific™) followed by reverse transcription using  
26 RevertAid First Strand cDNA Synthesis Kit (Thermo Scientific™) according to the  
27 manufacturer's instructions for use with oligo-dT. cDNAs were amplified by  
28 conventional end-point RT-PCR using specific primers to assess for sequence specificity.  
29 Then, real-time PCR was performed as described previously (Bustamante et al., 2018).  
30 All analyses were done in triplicate on a QuantStudio qPCR instrument (Thermo  
31 Scientific™) using a standard protocol. The efficiency of PCR amplification was derived  
32 from a standard curve generated by four 10-fold serial dilution points of cDNA obtained

1 from a mix of all the samples. Relative RNA expression was quantified by the  
2 comparative  $\Delta\Delta C_T$  method (Livak & Schmittgen, 2001) and normalized to the geometric  
3 mean of Profilin (NM\_001297545.1) expression. The statistical significance of the  
4 observed differences was evaluated by the paired  $t$ -test. All primers used were  
5 described previously (Sanz-Carbonell et al., 2019).

6

## 7 **2.4 Bioinformatic analysis of miRNA sequences**

8 To study the correlation exhibited by the miRNA expression profiles among the different  
9 stresses and their biological replicates, principal component analysis (PCA) was used.  
10 PCA was performed using the `prcomp` function with scaling in the stats R package v.  
11 4.0.4 (R Core Team 2013). Mann-Whitney-Wilcoxon tests were performed to assess for  
12 significant differences in the data clusters for Euclidean distances calculated between  
13 groups and among groups with the `wilcox.test` function in the stats R package.

14 Differential expression of melon sRNAs was estimated using three R packages  
15 NOISeq (Tarazona et al., 2015), DESeq2 (Love, Huber & Anders, 2014) and edgeR  
16 (Robinson & Oshlack, 2010) for pairwise differential expression analysis of expression  
17 data. Differentially expressed sRNAs were filtered out using three criteria: (i)  $\log_2$ -fold  
18 change  $|\log_2 FC| \geq 1.25$ , (ii) adjusted  $p \leq 0.05$  (DESeq2 and edgeR) and probability  $\geq 0.95$   
19 (NOISeq), and (iii) RPMs  $\geq 5$  for at least three libraries in control samples or at least two  
20 libraries in any stress. sRNAs identified as responding to stress by the three methods  
21 were aligned against miRNA sequences in miRBase (release 22) (Kozomara, Birgaoanu &  
22 Griffiths-Jones, 2019). Only fully homologous miRNAs to previously described mature  
23 melon miRNAs and known *Viridiplantae* miRNAs were kept. Afterwards, these  
24 sequences were re-annotated by aligning them against miRNA precursors of melon  
25 deposited in miRBase and were considered as known stress-responsive miRNAs.  
26 Unaligned sequences were realigned allowing for one mismatch against the melon  
27 genome to identify potential precursors. These sequences were also identified as  
28 known stress-responsive miRNAs; the rest were discarded. The entire pipeline is shown  
29 in Figure S2.

30 To determine the general sense of the expression for each miRNA family we  
31 employed the median value of expression estimated by box-plot analysis of all family-  
32 related sequences under each stress condition considering the  $\log_2 FC$  values obtained

1 by edgeR. The most frequent sequence in each miRNA family and stress were used to  
2 generate heatmaps with an R interface to morpheus.js heatmap widget  
3 (<https://github.com/cmap/morpheus.R>).

4

## 5 2.5 Analysis of the stress combination effect

6 The expression of reactive miRNAs in response to combined stress conditions can be  
7 enfolded in at least one of the three following categories: (i) additive if the observed  
8 response to combined stresses is just the sum of the magnitude responses observed for  
9 each individual stress, i.e., this represents the null hypothesis of independent actions,  
10 (ii) negative if the observed response is smaller than the expected additive response  
11 and (iii) positive if the observed value is greater than the expected additive response. In  
12 this framework, if a given miRNA shows an additive response upon exposure to two  
13 stresses, it can be assumed that both stresses trigger independent miRNA-mediated  
14 responses. In contrast, a miRNA showing a significantly negative or positive deviation  
15 from the null hypothesis, shall be taken as indicative of a specific response to the  
16 combined stresses beyond the simple additive case. To quantitatively test the null  
17 hypothesis of additive effects on miRNA-mediated response to stress combinations, we  
18 define an *stress combination effect (SCE)* index that refers to the miRNA response value  
19 to combined stresses in comparison to what should be expected from individual stress  
20 conditions as  $SCE = (C + S_{ab}) - (S_a + S_b)$ , where  $C$  refers to the means of the  
21 normalized reads recovered in control,  $S_{ab}$  to the reads observed in plants exposed to  
22 combined stresses  $a$  and  $b$  and  $S_a$  and  $S_b$  to the reads arising from each individual stress  
23 (Table S6A and Table S6B). For the triple stress condition ( $S_{abc}$ ) and additional value ( $S_c$ )  
24 -referred to the means of normalized reads in the additional stress condition  $c$ - should  
25 be added to the second terms of the equation. Only  $SCE$  values with a significant false  
26 discovery rate (FDR)-adjusted  $p$  value were considered as reliable indicators of effects  
27 of stress-combinations onto miRNA accumulation.

28 Reads exhibiting zero means values in any of the analyzed combinations were  
29 filtered out. The data associated to the miRNA expression under single stress  
30 conditions were extracted from a previous work analyzing the differential expression of  
31 melon miRNAs in response to seven biotic and abiotic single stress conditions (Sanz-  
32 Carbonell *et al.* 2019). The statistical significance of these effects was calculated on the



1 basis of a standard Normal distribution. Then, the 22 stress-responsive miRNA-families  
2 were organized in a binary table of presence and absence (Table S7), in which the  
3 values one and zero represent, respectively, whether or not a miRNA family has at least  
4 a member exhibiting a significant non-additive (positive or negative) effect in response  
5 to a combined stress condition. The hclust function in stats R package (v. 4.0.4) was  
6 used to compute a hierarchical clustering (HC) specifying Ward linkage (ward.D) as an  
7 agglomeration method and using the simple matching coefficient metric to calculate  
8 the distance matrix. The statistical significance of the HC was estimated with a Mann-  
9 Whitney-Wilcoxon test.

10

### 11 3 RESULTS

#### 12 3.1 Stress combinations and sRNAs dataset

13 High-throughput sequencing of sRNAs was performed starting from 22 (three replicates  
14 for each stress condition plus four non-treated controls) sRNA libraries constructed with  
15 RNA extracted from leaves of melon plants 11 days after exposure to six (five double  
16 and one triple) combined stress conditions: (i) cold and drought (C-D), (ii) cold and  
17 salinity (C-Sal), (iii) cold and short day (C-SD), (iv) drought and salinity (D-Sal), (v)  
18 drought and *M. cannonballus* infection (D-Mon), and (vi) cold, salinity and short day (C-  
19 Sal-SD) (Table S1). Regarding the stress conditions analyzed, we selected abiotic  
20 conditions well established as crucial for melon plant development (cold, drought,  
21 salinity, and short day) and infection with *M. cannonballus*, a soil-borne fungal  
22 pathogen causing root rot and wilting in melon (Pollack & Uecker, 1974). Only  
23 sequences with size ranging between 20 - 25 nt in length and nonmatching to rRNA,  
24 tRNA, snoRNA, and snRNA sequences deposited in the Rfam data base  
25 (<http://rfam.xfam.org>) were further included in this study. A total of 80,620,994 reads  
26 (representing 36,836,230 unique sequences) were recovered. The distribution of reads  
27 by stress condition is detailed in Table S2.

28 Associations between sRNA expression profiles (considering the different  
29 treatments and their biological replicates) were evaluated using PCA. The percentages  
30 of variance explained by the first three PCs were 20.4%, 17.1% and 13.8%, respectively  
31 (adding up to 51.3% of the total observed variance). The PCA plot in Figure 1A shows  
32 that biological replicates clustered together (attesting for the reproducibility of our

1 assays) and treatments clearly separated in the PC space with high significance ( $p =$   
 2  $5.886 \times 10^{-15}$ ). The sRNAs exhibited a distribution of read lengths strongly enriched for  
 3 24 nt long (45.7%), followed by similar accumulations of 21 (13.5%), 22 (12.6%) and 23  
 4 (13.5%) nt long molecules. As expected, reads of 20 and 25 nt represented the less  
 5 abundant categories (5.9% and 8.5%, respectively) (Figure 1B). These differences in  
 6 accumulation of different sRNA lengths was statistically significant (2-ways non-  
 7 parametric ANOVA, Table S3:a  $p < 10^{-5}$ ). The effect was entirely due to the large  
 8 enrichment in 24 nt long sRNAs (Dunn's post hoc pairwise tests, Table S3b:  $p \leq 0.0134$   
 9 in all pairwise comparisons) and consistent with what has been previously described in  
 10 melon (Sattar et al., 2012; Herranz, Navarro, Sommen & Pallas 2015; Sanz-Carbonell et  
 11 al., 2019; Sanz-Carbonell, Marques, Martinez & Gomez, 2020) and other members of  
 12 the *Cucurbitaceae* family (Jagadeeswaran et al., 2012). Non-significant differences were  
 13 found between stress conditions regarding the observed distribution of sRNAs sizes  
 14 (Table S3a:  $p = 0.857$ ), nor the interaction between both factors (Table S3a:  $p = 0.750$ ).

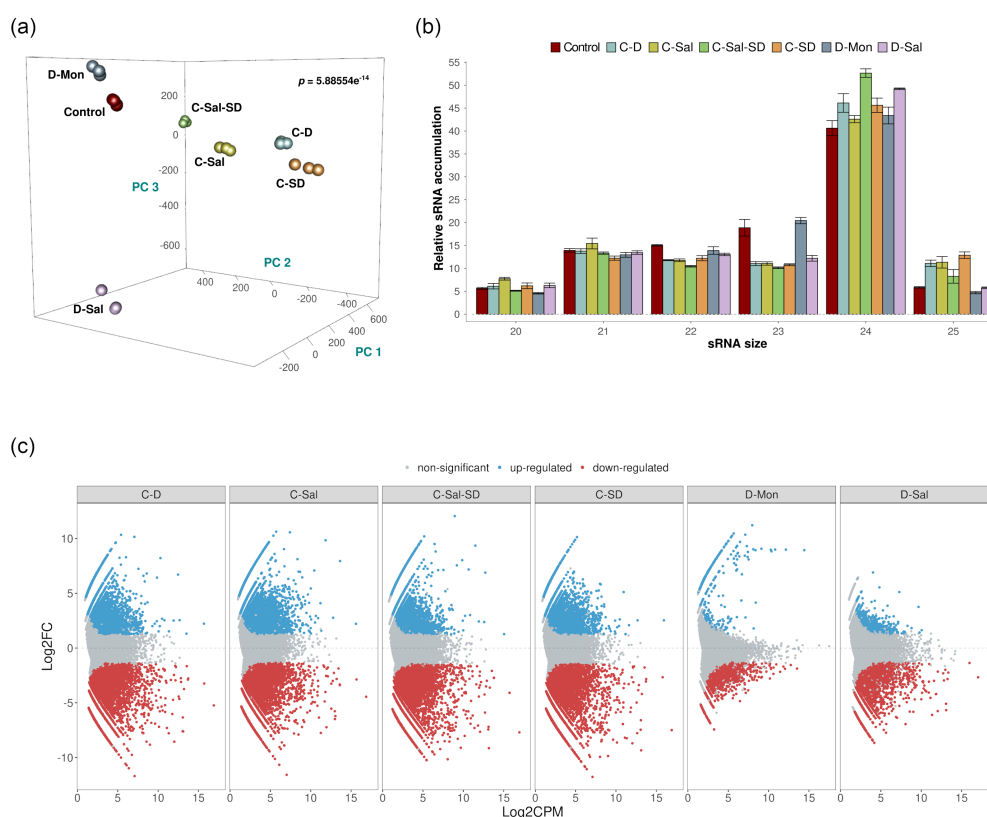

**Figure 1 Analysis of the sRNA population.** (a) PCA based on sRNAs accumulation in three biological replicates of melon plants exposed to the six stress combined treatments and controls. The statistical significance ( $p = 5.886 \times 10^{-14}$ ) was estimated by Mann-Whitney-Wilcoxon test, considering the inter- and intra-group Euclidean distances. (b) Diagram showing the relative accumulation (and distribution of the total clean reads of melon sRNAs ranging between 20 - 25 nt obtained from the analyzed sequenced libraries. The control and the different analyzed treatments are represented with colors. The shown values represent the sum of all repetitions. Bars indicate the standard error. (c) Graphic representation of the expression values (estimated by edgeR) of sRNA sequences recovered from melon exposed to different stress conditions. The dots indicate the expression value of each sRNA. Red and blue dots indicate significant values for differential expression with  $-1.25 \leq \log_2FC \leq 1.25$ , respectively. Grey dots indicate sRNAs with non-significant differential expression.

1 The effect of the stress conditions onto sRNAs accumulation was evaluated by  
2 pairwise comparisons between control and treated samples. As described in section 2.4  
3 above, only sequences that match the conditions  $|\log_2FC| \geq 1.25$  and  $p < 0.05$ , were  
4 considered as significantly differentially expressed and retained for subsequent analysis  
5 (Figure S1). A total of 35,906 unique reads fulfilled these conditions. The combinations  
6 that included cold as one of the stressors showed the most drastic alteration in sRNAs  
7 accumulation (21,592 reactive sRNAs in C-D, 20,760 in C-Sal, 23,506 in C-SD and 21,263  
8 in C-Sal-SD). In contrast, only 1595 and 3988 differentially expressed sRNAs were  
9 identified in plants treated with the combination D-Mon and D-S, respectively (Figure  
10 S2B). These results support the notion that exposition to low temperature (in any  
11 combination) is the most stressful environmental condition, resulting in the strongest  
12 alteration of the sRNA metabolism in melon (Figure 1C).

13

### 14 **3.2 Combined stresses induce a general decrease of miRNA expression**

15 To identify melon miRNAs reactive to combined stress conditions, differentially  
16 expressed sRNAs were aligned against miRNA sequences (both mature and precursors)  
17 recovered from miRBase (<http://www.mirbase.org/>). Only sRNAs ranging 20 - 22 nt and  
18 fully homologous to database sequences, were considered. Two sequences  
19 homologous to mature miR6478 but lacking a known transcript in melon with a  
20 canonical hairpin were excluded for subsequent analysis (Figure S1). After filtering, 100  
21 unique sequences belonging to 22 known miRNA families were identified as responsive  
22 to the combined stress conditions studied (Table S3). In general, all family-related  
23 sequences showed a comparable trend of accumulation in response to the stress  
24 conditions analyzed (Figure 2A). A sequence-variant of miR398b (down-regulated in C-  
25 D treatment, but showing a minority accumulation rate respect to predominant family-  
26 related sequences) and the non-canonical miRNAs derived of the alternative processing  
27 of miR319 (miR319nc) (Bustamante et al., 2018) and miR159 (miR159nc) (Bologna,  
28 Mateos, Bresso & Palatnik, 2009) precursors (up-regulated in cold-containing  
29 combinations and without regulatory activity described yet) showed a discordant  
30 response with the family-wise trend. In these two circumstances, the response trend of  
31 the more representative family members was considered for ulterior analysis.

1 The general response to stress conditions was the down-regulation of miRNAs  
 2 (Figure 2B). Sequences included in miRNA families miR157, miR159, miR167, miR168,  
 3 miR319, and miR396 showed significantly decreased accumulation in all the stress  
 4 conditions analyzed. Diminished accumulation in response to stress was also observed  
 5 for miR156, miR160 (except under C-Sal-SD), miR164, miR166, miR169 (except for D-  
 6 Sal), miR171, miR172 (except for D-Sal and D-Mon), miR393 (except for D-Mon),  
 7 miR394, and miR1515. Finally, miR165 was down-regulated in three stress conditions  
 8 involving cold (C-SD, C-D and C-Sal). Regarding miRNAs up-regulated in response to  
 9 stress, the miR398 and miR408 family-related members (except for the reads related to  
 10 miR398b described above) showed increased accumulation in all stress conditions,  
 11 whereas miR159 was significantly overexpressed in response to C-SD and C-D and  
 12 miR397 family was so in plants exposed to C-Sal, C-Sal-SD and D-Mon. Sequences  
 13 related to miR156, miR166 and miR395 were specifically up-regulated under D-Sal  
 14 stress.  
 15

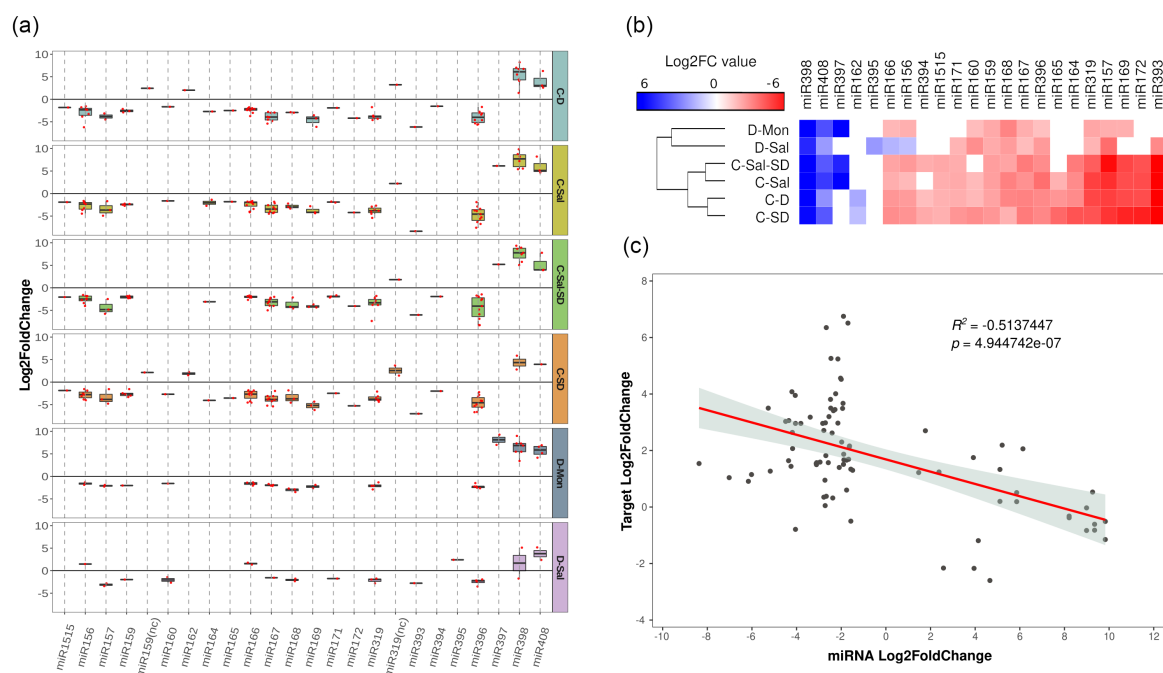

**Figure 2** General description of stress-responsive miRNA families: (a) Boxplot analysis showing the general expression value observed for each miRNA-family member. To determine the general sense of the expression for each miRNA family we employed the median value of expression (represented by internal box-line) estimated by boxplot analysis of all family-related sequences. The differential expression values represented in the figure correspond to the log2FC obtained using edgeR. (b) Heatmap of 22 miRNAs differentially expressed in melon in response to combined stress. The differential expression values represented correspond to the median of the log2FC values obtained using edgeR for each miRNA family. (c) Scatter plot showing the significant negative correlation (estimated by Pearson correlation coefficient) between the expression levels of 16 selected stress-responsive miRNAs with differential accumulation determined by sequencing and the accumulation of their targets in the corresponding stress conditions, estimated by RT-qPCR.

16  
 17

1        The analysis of the miRNA expression focused on each particular stress  
2 combination evidenced that cold was the most adverse environmental condition with  
3 major impact on miRNA expression in melon. A total of 20 miRNA families were  
4 reactive to C-SD and C-D and 19 to C-Sal (Figure 2B and Table S4). While 18 miRNAs  
5 families showed differential expression under the combination of three stresses. A  
6 weaker response was associated to treatments with D-Sal (14 reactive miRNA families)  
7 and D-Mon (13 miRNAs with altered expression). Considering both stress condition and  
8 miRNA expression-trend, except miR156 and miR166 (up-regulated in D-Sal and down  
9 regulated in the other stress conditions), all miRNAs exhibit a homogenous response to  
10 the six combinations of adverse environmental conditions analyzed.

11        It has been recently proposed that certain melon miRNAs are predominantly  
12 reactive to diverse biotic and abiotic stress conditions, while other specifically respond  
13 to certain stressor and/or expositions time (Sanz-Carbonell, Marques, Martinez &  
14 Gomez, 2020). Based on this particular behavior miRNAs belongs to both different  
15 groups were identified as stress responsive miRNAs with *broad* and *narrow* response  
16 range, respectively, while a third group that exhibit a moderated reactivity in response  
17 to stress were identified as *intermediates*. According to our data, ten miRNA families  
18 showed the higher response rate to combined stress, with significant differential  
19 expression (either up or down) in the six analyzed conditions (Table S4). Eight of these  
20 miRNA families (miR156, miR157, miR166, miR167, miR319, miR396, miR398, and  
21 miR408) were mostly coincident with melon miRNAs families classified in the broad  
22 response category (*generalists*), while miR159 and miR168 were previously categorized  
23 as intermediates. In contrast, miRNAs with a lower response rate to double and triple  
24 stresses (responsive in three or less conditions), pervasively pertained to miRNAs  
25 families previously reported as showing *specific* response to stress conditions in melon.

26        To test the functional role of the miRNAs reactive to combined stresses, we  
27 analyzed the correlation between miRNA levels and transcripts accumulation in 16  
28 representative miRNA-target modules (Table S5) previously established and validated to  
29 occur in melon plants (Bustamante et al., 2018; Sanz-Carbonell et al., 2019; Sanz-  
30 Carbonell, Marques, Martinez & Gomez, 2020). We focused on the miRNAs reactive to  
31 at least three different stress conditions (miR156, miR159, miR160, miR164, miR166,  
32 miR167, miR169, miR171, miR172, miR319, miR393, miR396, miR397, miR398, and

1 miR408). As expected, a significant negative correlation ( $r = -0.514$ , 83 df,  $p =$   
2  $4.945 \times 10^{-7}$ ) was obtained when the expression values of stress-responsive miRNAs  
3 were compared with the accumulation (estimated by RT-qPCR) of their target-  
4 transcripts (Figure 2C).

5

### 6 **3.3 The miRNA-mediated response to stress combinations cannot be** 7 **predicted from the response to single stresses**

8 To determine the dynamic of the miRNA-mediated response to multiple stress  
9 conditions we compare the accumulation levels of stress-responsive miRNAs in plants  
10 subjected to the individual stress conditions with those of plants exposed to combined  
11 stresses. To do so, we computed *SCE* as defined in section 2.5 above. Except for the  
12 combination C-Sal-SD, the additive effect was predominant in number of unique miRNA  
13 sequences in the analyzed stress combinations (65.26% of the unique reads) (Figure  
14 3A). However, considering the entire miRNAs population (total reads) a comparable  
15 abundance of additive (50.07%) and non-additive (49.93%) instances was observed in  
16 response to combined stresses. Interestingly, when evaluating only by miRNA family,  
17 57.58% had at least a member showing a significant (negative or positive) *SCE* value  
18 (Figure 3A and Table S7).

19 Regarding significant non-additive interactions, the stress combination  
20 predominantly exerted a negative effect in four (C-Sal, D-Sal, D-Mon, and C-Sal-SD) of  
21 the six analyzed treatments (Figure 3B). By contrast, in C-D and C-SD,  $SCE > 0$  values  
22 were the most common. Analyzing each stress combination individually, C-SD was the  
23 condition in which miRNAs shown the smallest fraction of specific response to  
24 combined stresses (14.46% of unique reads, 7.77% of total reads and 40.91% of the  
25 miRNA families). In contrast, a higher differential interaction (76.47% for negative and  
26 2.94% for positive) was observed in response to the triple combinations C-Sal-SD  
27 (61.45% of unique reads, 92.05% of total reads and 77.27% of the miRNA families)  
28 (Figure 3B). A more general view of the additive and non-additive effects of the  
29 combined stresses onto the global population of miRNA-related reads in each analyzed  
30 stress condition is showed in the Figure 3C.

31

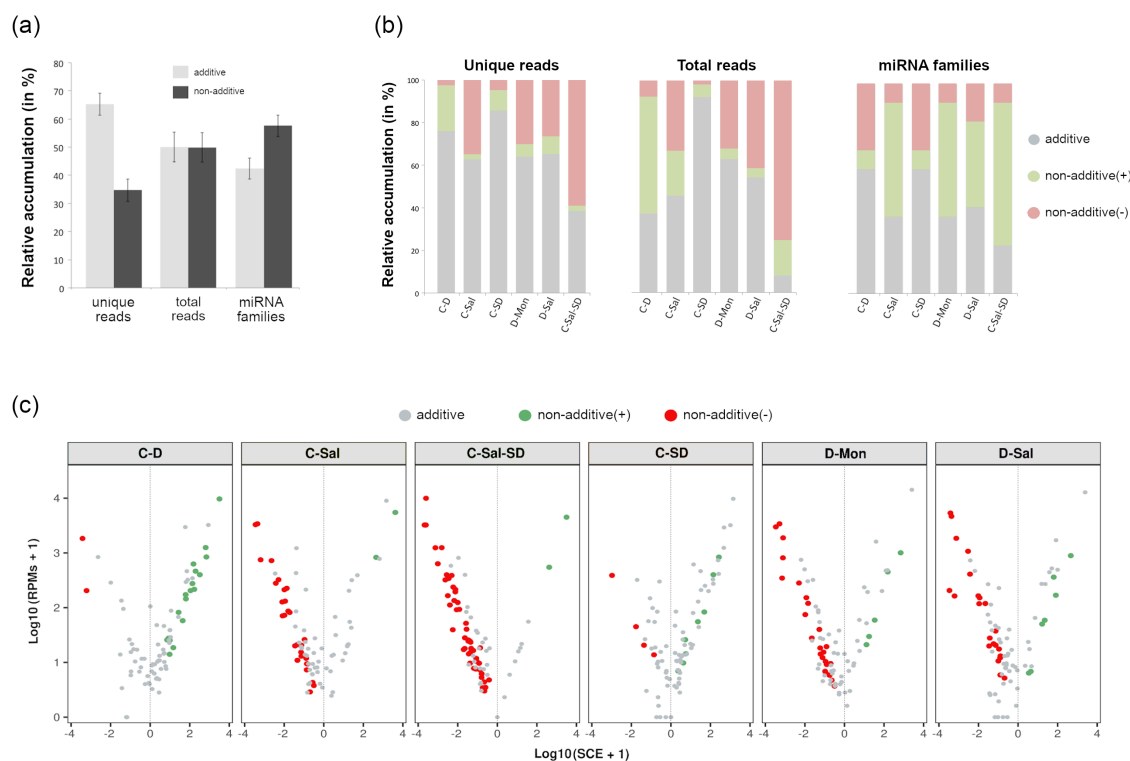

**Figure 3 Effects of the stresses combination onto the accumulation rate of stress responsive miRNAs.** (a) Graphic representation of the mean percentage for the six analyzed treatments of miRNA related reads that exhibit additive (grey) or non-additive (black) response to combined stress conditions in comparison to single stresses considering unique reads (left columns), total reads (central columns) and miRNA families (right). Bars represent the standard error between means. (b) Detail of the global response rate in each stress condition considering the two (positive or negative) type of possible non-additive response to combined stresses. (c) Volcano plot showing significant positive (green dots) and negative (red dots) *SCE* values obtained for each miRNA-related read, in response to each combined stress condition. miRNAs with non-significant deviations from the additive null model are in grey. More detailed information is in the Table S6B.

1  
2  
3

4 Considering the response trend of miRNA family members, we observed that, in  
5 general, reads showed a coordinated interaction (*SCE* positive or negative) in response  
6 to the combination of stresses (Figure 4A). Consequently, a negative response was also  
7 pervasive under a global miRNA-family viewpoint. Exceptions to this rule were  
8 observed for the families miR157 in C-SD and miR159 in D-Sal, that contained members  
9 showing both positive and negative *SCE* values under the indicated stress combination.  
10 However, it is worth nothing that the miRNA sequences with a non-coincident trend are  
11 minority relative to the other family members (Table S6A). Therefore, in these two  
12 specific cases the response trend of the predominant reads was considered as  
13 representative of the family behavior for ulterior analysis (Figure 4B). The highest  
14 number (17) of miRNA families showing significant *SCE* values was observed in plants  
15 exposed to the triple combinations of stresses, followed by C-Sal and D-Mon (14) and D-  
16 Sal (13). In contrast, only nine miRNA-families were identified as significantly  
17 interactive in response to C-D and C-SD, respectively.

1

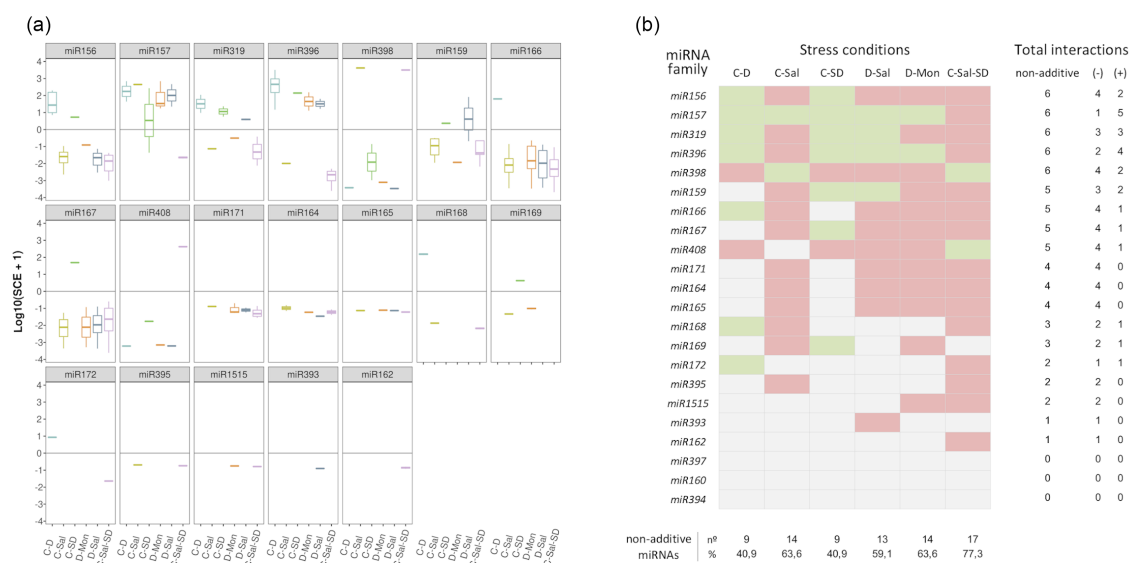

**Figure 4** Members in each miRNA family respond in a coordinated manner to combined stresses. **(a)** Boxplot analysis showing the SCE values for family-miRNA related members in each combined stress condition. To determine the general sense of the effect induced by combined stresses for each miRNA family we employed the median of the SCE values obtained for the totality of the family members (represented by internal box-line). **(b)** Graphic representation of the global non-additive positive (green) or negative (red) effects associated to combined stresses estimated for each miRNA family in the six stress conditions analyzed here. The number of combined stresses that induce positive and/or negative non-additive responses in each miRNA family is detailed in the right columns. The proportion of miRNA families with non-additive effects in response to each combined stresses is detailed below.

2

3

4

5

### 3.4 Different miRNAs families act distinctively in response to combined stresses

6

7

To get further insights into the response of each miRNA family to combined stress conditions, we analyzed the rate of differential response to double and triple stresses.

8

9

The 22 stress-responsive miRNA-families were organized into a table of presence and absence (Table S8) in which the values one and zero represent, respectively, whether or not a miRNA shows a significant response value (with either positive or negative effect)

10

11

under a combined stress condition. Members of miR156, miR157, miR319, miR396, and miR398 families showed significant positive or negative SCE in the six stress conditions analyzed here, while miR159, miR166, miR167, and miR408 members accumulate differentially in five stresses combinations.

12

13

Sequences belonging to miR164, miR165, miR171, and miR393 (with positive or negative SCE in four conditions), miR168 and miR169 (in three), miR172, miR395 and miR1515 (in two) and miR162 (negative effect under C-Sal-SD), showed the lowest differential accumulation in response to the combined stress.

14

15

16

17

Responsive miRNAs included in the miR160, miR394 and miR397 families lacked of significant interactions in any the six analyzed stress conditions.

18

19

20



1 Correlation between miRNA responses (considering miRNA behavior and the  
 2 different combined treatments) was estimated by multi-cluster analysis (MCA). MCA  
 3 evidenced that the response values to combined stresses can be organized into three  
 4 significantly different groups (Figure 5A). The group including miR156, miR157, miR166,  
 5 miR319, miR396, miR398, and miR408 contained the miRNA families that exclusively  
 6 show significant non-additive response values ( $SCE \neq 0$  values) to combined stress  
 7 conditions. In contrast, families (miR160, miR162, miR168, miR172, miR394, miR397,  
 8 miR395, and miR1515) with predominantly independent responses were clustered in  
 9 the second group. Families of miRNAs in which the proportion of significant ( $SCE \neq 0$   
 10 values) and non-significant (additive  $SCE$  values) response was comparable (miR159,  
 11 miR164, miR165, miR167, miR169, miR171, and miR393) were also clustered together.  
 12

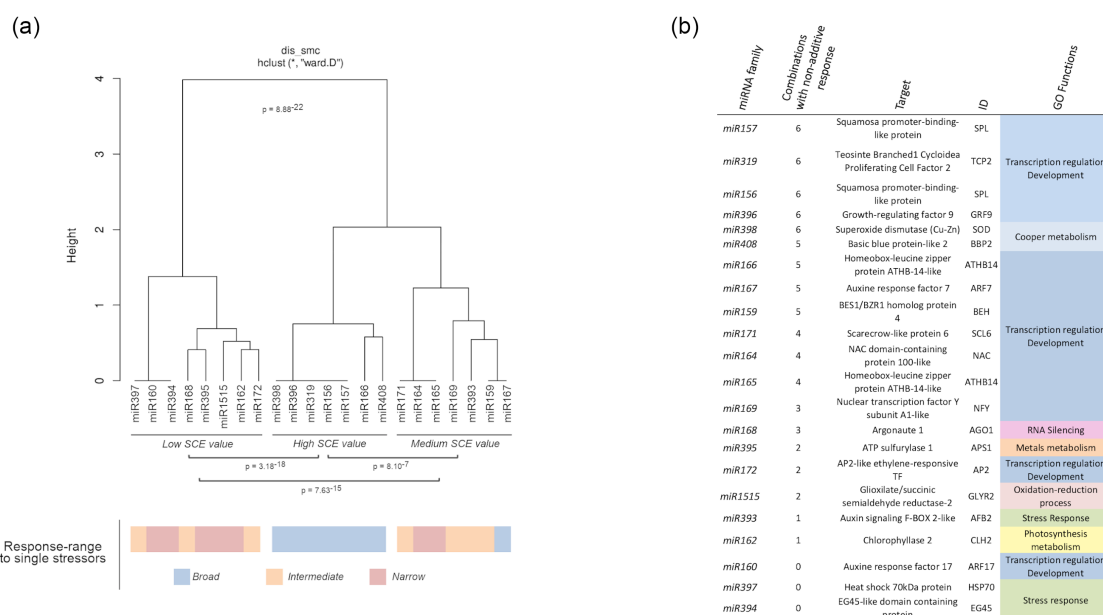

Figure 5 Biological functions of miRNAs with non-additive response to combined stresses. (a) Dendrogram showing the clustering of miRNA families with at least a member with significant non-additive response to combined stresses in three main groups according to their SCE values in the analyzed stress conditions. The global statistical significance of the identified clusters ( $p = 8.88 \times 10^{-22}$ ) was estimated by Mann-Whitney-Wilcoxon test, considering the inter- and intra-group Euclidean distances. The lower panel shows the response range determined for each miRNA family in response to single stresses with both biotic and abiotic source (using a color scale). (b) Description and detailed information of the targets for miRNAs with significant non-additive response to combined stresses identified in melon plants. The GO terms were estimated in base to information of homologous transcripts in *A. thaliana*.

13  
 14  
 15 Interestingly, all the miRNAs clustered in the group showing significant non-additive  
 16 expression in response to combined stresses correspond to melon miRNA families  
 17 already identified as reactive to a broad range of stress (generalists) (Sanz-Carbonell,  
 18 Marques, Martinez & Gomez, 2020), while miRNAs characterized by a narrow response  
 19 range (specialists) are the most frequent class (five out eight) in the group showing

1 mainly an additive response to double and triple stresses (Figure 5A - lower part).  
2 Finally, miRNAs identified previously as intermediates, are mainly (four out seven)  
3 included in the group where significant and non-significant response to the combination  
4 of stressor was observed at comparable frequencies. The specialist miRNAs exhibit  
5 exclusively  $SCE < 0$  response to double and triple stresses, whereas miRNAs identified as  
6 generalists showed an even distribution of significant non-additive responses (20  
7 positive and 25 negative  $SCE$  values). Intermediate miRNAs, although showed a few  
8 miRNAs (five) with positive effects, were predominantly (sixteen miRNA families)  
9 characterized by a negative response to the combination of stresses. The relationship  
10 between miRNA trend response and stress condition was generally dependent of the  
11 specific stress/miRNA interaction, although the miR398 and miR408 families showed a  
12 coordinated response in all the analyzed conditions, with the exception of C-Sal.  
13 However, a positive response ( $SCE = 654.96$ ,  $p = 0.04$ ) was observed for miR408, in this  
14 condition, although was considered as non-significant based in the FDR criterion (Table  
15 S6). This specifically coordinated activity of the miR398/miR408 tandem was  
16 particularly evident in response to, C-SD and C-Sal-SD in which their response was the  
17 opposite to the general trend observed for the remaining miRNA families.

18 Regarding miRNA-regulated targets, it was evident that miRNAs involved in the  
19 regulation of transcription factors (TF) associated to plant-development exhibit the  
20 higher rate of differential response to combined stress (Figure 4c). In contrast miRNA  
21 families expected to modulate the expression of transcripts related (according to GO  
22 terms) to a more diverse range of biological functions (RNA silencing, metals  
23 metabolism, photosynthesis, response to stress, etc.), showed predominantly a non-  
24 significant response to stresses combination.

25

26

## 27 4 DISCUSSION

28 Much effort has been dedicated to elucidating the mechanisms underlying stress  
29 response in crops. Although great progress has been made in the last years, including  
30 the identification of both protein-coding and non-coding transcripts responsive to  
31 different stresses, most studies focused on deciphering the plant regulatory pathways  
32 triggered in response to single stress conditions. Alas, no much effort has been devoted

1 to understand the plant responses to multiple stresses acting simultaneously; a  
2 situation that is most common in the wild.

3 Here, we have addressed this question by measuring the miRNA-mediated  
4 responses to combined stresses in melon plants exposed to five different double and  
5 one triple stressful condition. Our strategy comprises two principal steps, first to  
6 identify the miRNA-families responding to double and triple stress conditions. Second,  
7 we compared the expression level of such responding miRNAs with the values  
8 previously obtained in melon plants exposed to the respective single stresses. This  
9 comparative analysis has allowed us to determine how the stress combinations affect  
10 the differential expression of miRNAs; disentangling stress-specific responses to general  
11 responses. This information enabled the inference of the global structure of the  
12 miRNA-mediated differential response to combined stress conditions in melon.

13 The computational analysis identified 22 miRNA families with significant differential  
14 expression in response to the analyzed stresses. Regarding their functional role, these  
15 reactive families mainly target melon homologous to well-described TFs (e.g.,  
16 SPOROCTELESS, BES1/BZR1 HOMOLOG 4, AUXINE RESPONSE FACTORS (ARF),  
17 ARABIDOPSIS THALIANA HOMEBOX PROTEIN 14, TEOSINTE BRANCHED  
18 1/CYCLOIDEA/PROLOFERATING CELL FACTOR, APETALA 2, GENERAL REGULATORY  
19 FACTOR (GR), and NUCLER FACTOR Y). This is in agreement with previous observations  
20 in other species (*A. thaliana*, rice, maize, sorghum, sunflower, etc.) in which it has been  
21 reported that in general, miRNAs reactive to stress target predominantly TFs (Samad et  
22 al., 2017). This reinforces the emerging notion that the role-played by miRNAs during  
23 the stress response is evolutionary conserved in plants (Rubio-Somoza & Weigel, 2011;  
24 Megraw, Cumbie, Ivanchenko & Filichkin, 2016; Sanz-Carbonell, Marques, Martinez &  
25 Gomez, 2020) and emphasizes the potential of miRNAs as targets for improving stress  
26 tolerance in crops (Tang & Chu, 2017; Chaudhary, Grover & Sharma, 2021). The totality  
27 of these stress-responsive miRNA families were coincident with the previously  
28 described as reactive in single biotic and abiotic stress conditions in melon (Sanz-  
29 Carbonell et al. 2019; Sanz-Carbonell, Marques, Martinez & Gomez, 2020). The  
30 observation that double and triple stresses do not induce the differential accumulation  
31 of any miRNA family reactive specifically to combined stress, suggest that (at least  
32 under the conditions analyzed here), the miRNA families involved in the response to

1 stress comprise the general structure that modulate the recovery of the plan-cell  
2 homeostasis under both single and combined adverse environmental conditions.

3       Considering the response rate to each stress-combination we observed a more  
4 consistent activity in certain miRNA families. Our results evidenced, that melon miRNAs  
5 (miR156, miR157, miR166, miR167, miR319, miR396, miR398, and miR408) previously  
6 characterized by exhibit differential accumulation in response to a wide range of biotic  
7 and abiotic stress conditions in melon, maize and soybean (dubbed as generalists), were  
8 differentially expressed in the six analyzed conditions, evidencing a high response  
9 range, independently of the stresses combination. Interestingly, miRNAs families  
10 reactive to four or less conditions (miR162, miR164, miR165, miR172, miR394, miR397,  
11 miR395, and miR1515) predominantly corresponded to miRNAs characterized by  
12 exhibiting differential response to specific stresses (specialists). It has been recently  
13 suggested that generalists stress-responsive miRNAs might be involved in the  
14 modulation of the central steps in the recovery of the cell homeostasis during the  
15 exposition to adverse environmental conditions, while specialists families responding to  
16 specific stress conditions and/or exposition times had been hypothesized to be involved  
17 in the regulation of metabolic processes associated to each particular stressor (Sanz-  
18 Carbonell *et al.* 2019; Sanz-Carbonell, Marques, Martinez & Gomez, 2020). Assuming  
19 this responsive behavior, it is expected that generalist miRNAs were the predominant  
20 class reactive to double and triple stresses. Sequences related to generalist miRNA-  
21 families are characterized by mainly modulating master regulators or central hubs,  
22 predominantly TFs related with plant development (Sanz-Carbonell, Marques, Martinez  
23 & Gomez, 2020). It is well established that alteration in the expression of TF genes  
24 normally results in remarkable changes in the global gene expression during plant  
25 growth and development (Li et al., 2015). Furthermore, it has been proposed that such  
26 TFs might, for example by co-regulatory feedback and feedforward loops miRNA/TF, act  
27 as amplifiers of the plant-response to stress (Rubio-Somoza & Weigel 2011; Megraw et  
28 al., 2016; Samad et al., 2017). The generalist class is comprised by miRNAs previously  
29 described as reactive to different biotic and/or abiotic stress conditions in diverse plant-  
30 species. Several studies support that the module miR156-SPLs besides exhibiting a  
31 broad response range to low temperatures in diverse plant-species (Zhou & Tang,  
32 2019), also improves tolerance to salinity, heat and drought in *Medicago sativa* (Arshad,

1 et al., 2017; Arshad, Gruber, Wall & Hannoufa, 2017; Matthews, Arshad & Hannoufa,  
2 2019). Moreover, the interaction between miR396 and GRF is involved in the  
3 modulation of the response to diverse biotic (*Phytophthora nicotianae*) and abiotic  
4 (drought, salt, alkali, UV-B radiation, and osmotic unbalance) stress conditions (Gao et  
5 al., 2010; Kim et al., 2012; Casadevall et al., 2013; Chen, Luan & Zhai, 2015). Cotton  
6 plants overexpressing miR157 suppressed the auxin signal and showed enhanced  
7 sensitivity to heat (Ding et al., 2017). Recent studies evidenced a critical function for  
8 miR166 in tolerance to abiotic stresses in maize (Li et al., 2020) and cadmium-induced  
9 toxicity in rice (Ding et al., 2018). By means of transgenic approaches it was established  
10 that miR167 acts as transcriptional regulator in response to bacterial infection (Jodder,  
11 Basak, Das & Kundu, 2017) and temperature-induced stress in tomato plants (Jodder et  
12 al., 2018). Multiple evidences obtained by both sRNA-sequencing and transgenic  
13 approaches, support the role of members of the miR319-family, an ancient miRNA  
14 conserved across plant species ranging from mosses to higher plants, as a key  
15 modulator of the plant-environment interrelation (at biotic and abiotic level) in  
16 monocotyledonous and dicotyledonous species (Bustamante et al., 2018; Liu et al.,  
17 2019; Shi et al., 2019; Wu, Qi, Meng & Jin, 2020; Fang et al., 2021; Joshi, Chauhan &  
18 Das, 2021). Finally, regarding miR398 and miR408 families, it was recently proposed  
19 that these conserved miRNAs, involved in the maintenance of the copper homeostasis  
20 in plants, might be also involved in the systemic signaling of the response to biotic and  
21 abiotic stresses (Burkhead et al., 2009; Sanz-Carbonell, Marques, Martinez & Gomez,  
22 2020).

23 Upon determining the melon miRNAs responsive to combined stress conditions, we  
24 attempted to analyze whether the expression of these stress-responsive miRNAs was  
25 different in comparison with that observed under each one of the stresses individually.  
26 Our conceptual premise assumes that miRNAs that did not show a significant  
27 differential (positive or negative) response to combined stresses exhibit an independent  
28 behavior to the combination of the stress conditions. The obtained results  
29 demonstrated that in a considerable proportion of the analyzed miRNA-stress  
30 combinations (59.85%), the stress-responsive miRNAs families exhibit a differential  
31 response to the action of combined stresses. This evidences that, although the miRNAs  
32 involved in the regulation of the response to a particular stress combination are

1 coincident with such described under individual stresses, the regulatory effects exerted  
2 on their targets is considerably different when the plant is exposed to a combination of  
3 adverse environmental conditions.

4       Considering in detail the differentially reactive miRNAs, we observed that generalist  
5 miRNAs showed the higher rate of differential accumulation (compared to the observed  
6 respect the response to single stresses) in response to combined adverse  
7 environmental conditions. Thus, supporting that the biosynthesis and/or processing of  
8 such miRNA-families is particularly (and differentially) susceptible to the combined  
9 exposition to two or three stress conditions. In contrast, the data obtained when  
10 miRNAs identified previously as specialists were analyzed evidenced that the expression  
11 of this class de miRNA families is predominantly independent of the effects of the  
12 combined-stresses and corresponds principally to the expression levels observed in  
13 response to each stressor individually. This functional behavior of responsive miRNAs  
14 to combined stresses is compatible with the architecture of the miRNA-mediated  
15 regulatory network of response to adverse environmental stimuli described recently in  
16 melon (Sanz-Carbonell *et al.* 2019; Sanz-Carbonell, Marques, Martinez & Gomez, 2020).  
17 Structurally, this network is characterized by exhibiting a central core of highly  
18 connected miRNAs (generalist), and another peripheral layer comprised of miRNA  
19 families with lower connectivity (*specialists*) (Figure 6A). According to this structure, it  
20 is expected that the expression of generalist miRNAs (highly interconnected and  
21 reactive to a broad range of stress conditions) might be differentially affected (either  
22 positively or negatively) by the incidence of two or more distinct stresses (Figure 6B). In  
23 contrast, specialist miRNA-families (with low connectivity and reactive to particular  
24 stress conditions) remain functionally independent to the effects of additional non-  
25 related stresses, and respond mainly to the exposition to combined stress conditions in  
26 additive (non-differential) manner (Figure 6A). The observation that the architecture of  
27 the miRNA-mediated regulatory network of response to stress in melon is able to  
28 predict the predominant reactivity rate of the miRNA-response to combined stresses,  
29 provide additional robustness to this inferred regulatory structure involved in the  
30 miRNA-mediated modulation of plant-environment interactions. Furthermore, the fact  
31 that a structurally comparable miRNA-networks of response to stress has been also  
32 proposed in rice and soybean plants exposed to diverse biotic and abiotic stress

1 conditions (Sanz-Carbonell, Marques, Martinez & Gomez, 2020), allows to speculate  
2 about the possibility that the response pattern to combined stresses observed in melon  
3 may well be extended to another crops.

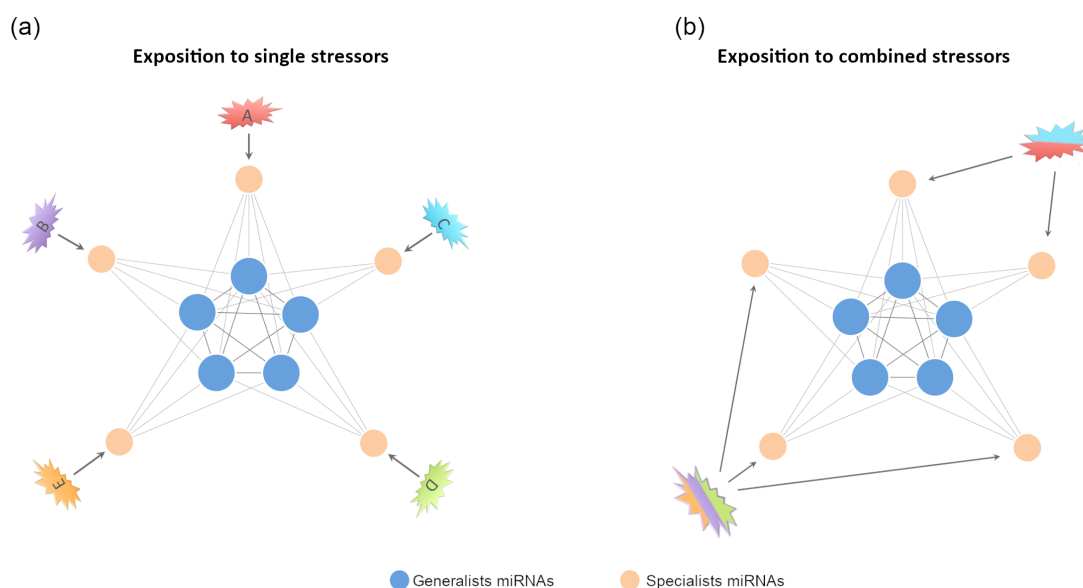

**Figure 6: Proposed model to explain predominant non-additive response in certain miRNAs families.** (a) Simplified graphic representation of the proposed miRNA-mediated network of response to stress in melon (Sanz-Carbonell et al., 2019; Sanz-Carbonell, Marqués, Martínez & Gómez, 2020). Blue nodes represent highly connected miRNAs with a broad response range to biotic and/or abiotic stress conditions (generalists). Orange nodes represent miRNAs reactive to specific stress conditions (specialists). (b) When the network is exposed to double or triple stress conditions is expected that the stresses combinations should not affect specialist miRNAs (poorly connected between them) and consequently they exhibit additive SCE values (comparable to the resultant of the sum of both individual responses). In contrast, generalist miRNAs (highly interconnected) respond to stresses combination in a differential (non-additive) manner, related to each stress combination.

4

5

6 In general, the transcripts of well-established TFs were the targets modulated by  
7 miRNAs with significant non-additive effects in response to combined stresses,  
8 reinforcing the key role assumed for the circuits miRNA-TF in the regulation of the  
9 stress response in plants (Rubio-Somoza & Weigel, 2011). Regarding the trend of the  
10 global differential miRNA-mediated response to combined stresses negative values  
11 were the most abundant. Response values lower than the expected for stress-  
12 independent effects might be initially assumed as an indicative of functional  
13 convergence in the miRNA-mediated response to combined stresses. It has been  
14 recently suggested that specific developmental events may be usually modulated by  
15 diverse miRNAs in rice (Tang & Chu, 2017). In this proposed model, miRNAs functionally  
16 converged via direct or indirect interaction between their targets. It is well established  
17 that osa-miR393 regulate the auxin receptors OsTIR1 and OsAFB2, both involved in the  
18 ubiquitin-mediated degradation of specific substrates during auxin signaling (Bian et al.,

1 2012; Li et al., 2016). Furthermore, osa-miR160 and osa-miR167 modulate the  
2 expression of at least three ARF transcripts (OsARF8, OsARF16 and OsARF18) (Yang,  
3 Han, Yoon & Lee, 2006; Li et al., 2014; Huang, Li & Zhao, 2016). Interestingly, cmel-  
4 miR393 and cmel-miR167 exhibit a predominant negative differential response  
5 (assumed as indicator of functional convergence) to the combined stresses analyzed  
6 here. Further studies are needed to determine the existence of a potential functional  
7 convergence in the miRNA-mediated response to multiple stresses.

8 Altogether, our results provide additional support to the anticipated notion that  
9 plants may use the miRNA-mediated regulation as pivotal mechanism to recover the  
10 cell homeostasis in response to both simple and combined stresses (Zhang, 2015;  
11 Samad et al., 2017; Zhu et al., 2019; Zhou et al., 2020). The confirmation that the  
12 previously described as generalist miRNAs are also the predominant components of the  
13 global miRNA-mediated response to combined stress conditions highlights the  
14 possibility that this class de miRNAs may emerge as a valuable breeding-target for  
15 improving, in the near future, crop tolerance to the multiple adverse environmental  
16 conditions associated to climate change.

17

## 18 ACKNOWLEDGEMENTS

19 J.M.M. is recipient of a predoctoral contract ACIF-2017-114 from the Generalitat  
20 Valenciana.

21

## 22 CONFLICT OF INTEREST

23 The authors do not have any conflict of interest to declare.

24

## 25 AUTHOR CONTRIBUTIONS

26 PVB: Performed and designed computational analysis, prepared figures, and discussed  
27 the results. JMM: Analyzed the results, prepared figures and contributed to write the  
28 manuscript. MCM: Conceived and performed RT-qPCR analyses and discussed the  
29 results. AGHA: performed RT-qPCR analysis. JCS: Performed computational analysis.  
30 BP: Provide the *Monosporascus* isolate and contributed to design the stress treatments.  
31 AJM: Provided melon seeds and contributed to design the stress treatments. SFE:  
32 Conceived and perform the estimation of the *SCE* values and revised the manuscript.  
33 GGG: Conceived and designed the experiments, analyze the results and drafted the  
34 manuscript. Manuscript review: All authors read and approved the final manuscript.

35



## 1 REFERENCE

- 2 Achkar N.P., Cambiagno D.A. & Manavella P.A. (2016) miRNA Biogenesis: A Dynamic  
3 Pathway. *Trends in Plant Science*.
- 4 Arshad M., Feyissa B.A., Amyot L., Aung B. & Hannoufa A. (2017a) MicroRNA156  
5 improves drought stress tolerance in alfalfa (*Medicago sativa*) by silencing SPL13.  
6 *Plant Science* **258**, 122–136.
- 7 Arshad M., Gruber M.Y., Wall K. & Hannoufa A. (2017b) An Insight into microRNA156  
8 Role in Salinity Stress Responses of Alfalfa . *Frontiers in Plant Science* **8**, 356.
- 9 Bartel D.P. (2004) MicroRNAs: Genomics, Biogenesis, Mechanism, and Function. *Cell*  
10 **116**, 281–297.
- 11 Bian H., Xie Y., Guo F., Han N., Ma S., Zeng Z., ... Zhu M. (2012) Distinctive expression  
12 patterns and roles of the miRNA393/TIR1 homolog module in regulating flag leaf  
13 inclination and primary and crown root growth in rice (*Oryza sativa*). *New*  
14 *Phytologist* **196**, 149–161.
- 15 Bologna N.G., Mateos J.L., Bresso E.G. & Palatnik J.F. (2009) A loop-to-base processing  
16 mechanism underlies the biogenesis of plant microRNAs miR319 and miR159. *The*  
17 *EMBO Journal* **28**, 3646–3656.
- 18 Bologna N.G. & Voinnet O. (2014) The Diversity, Biogenesis, and Activities of  
19 Endogenous Silencing Small RNAs in Arabidopsis . *Annual Review of Plant Biology*  
20 **65**, 473–503.
- 21 Brant E.J. & Budak H. (2018) Plant small non-coding RNAs and their roles in biotic  
22 stresses. *Frontiers in Plant Science* **9**, 1038.
- 23 Burkhead J.L., Gogolin Reynolds K.A., Abdel-Ghany S.E., Cohu C.M. & Pilon M. (2009)  
24 Copper homeostasis. *New Phytologist* **182**, 799–816.
- 25 Bustamante A., Marques M.C., Sanz-Carbonell A., Mulet J.M. & Gomez G. (2018)  
26 Alternative processing of its precursor is related to miR319 decreasing in melon  
27 plants exposed to cold. *Scientific Reports* **8**.
- 28 Casadevall R., Rodriguez R.E., Debernardi J.M., Palatnik J.F. & Casati P. (2013)  
29 Repression of Growth Regulating Factors by the MicroRNA396 Inhibits Cell  
30 Proliferation by UV-B Radiation in &em>Arabidopsis&/em> Leaves. *The*  
31 *Plant Cell* **25**, 3570 LP – 3583.
- 32 Cervera-Seco L., Marques M.A.C., Sanz-Carbonell A., Marquez-Molins J., Carbonell A.,

- 1 Darós J.A. & Gomez G. (2019) Identification and Characterization of Stress-  
2 Responsive TAS3-Derived TasiRNAs in Melon. *Plant & Cell Physiology* **60**.
- 3 Chaudhary S., Grover A. & Sharma P.C. (2021) MicroRNAs: Potential Targets for  
4 Developing Stress-Tolerant Crops. *Life* **11**.
- 5 Chen L., Luan Y. & Zhai J. (2015) Sp-miR396a-5p acts as a stress-responsive genes  
6 regulator by conferring tolerance to abiotic stresses and susceptibility to  
7 *Phytophthora nicotianae* infection in transgenic tobacco. *Plant Cell Reports* **34**,  
8 2013–2025.
- 9 Cheng X., He Q., Tang S., Wang H., Zhang X., Lv M., ... Liu J. (2021) The miR172/IDS1  
10 signaling module confers salt tolerance through maintaining ROS homeostasis in  
11 cereal crops. *New Phytologist* **n/a**.
- 12 Ding Y., Gong S., Wang Y., Wang F., Bao H., Sun J., ... Zhu C. (2018) MicroRNA166  
13 Modulates Cadmium Tolerance and Accumulation in Rice. *Plant Physiology* **177**,  
14 1691–1703.
- 15 Ding Y., Ma Y., Liu N., Xu J., Hu Q., Li Y., ... Zhang X. (2017) microRNAs involved in auxin  
16 signalling modulate male sterility under high-temperature stress in cotton  
17 (*Gossypium hirsutum*). *The Plant Journal* **91**, 977–994.
- 18 Fang Y., Zheng Y., Lu W., Li J., Duan Y., Zhang S. & Wang Y. (2021) Roles of miR319-  
19 regulated TCPs in plant development and response to abiotic stress. *The Crop*  
20 *Journal* **9**, 17–28.
- 21 Gao P., Bai X., Yang L., Lv D., Li Y., Cai H., ... Zhu Y. (2010) Over-expression of osa-  
22 MIR396c decreases salt and alkali stress tolerance. *Planta* **231**, 991–1001.
- 23 Gonzalo M. & Monforte A. (2017) Genetic Mapping of Complex Traits. *Genomics:*  
24 *Essential Methods*, 269–290.
- 25 Gray S.B. & Brady S.M. (2016) Plant developmental responses to climate change.  
26 *Developmental Biology* **419**, 64–77.
- 27 Gupta A., Patil M., Qamar A. & Senthil-Kumar M. (2020) ath-miR164c influences plant  
28 responses to the combined stress of drought and bacterial infection by regulating  
29 proline metabolism. *Environmental and Experimental Botany* **172**, 103998.
- 30 Haak D.C., Fukao T., Grene R., Hua Z., Ivanov R., Perrella G. & Li S. (2017) Multilevel  
31 Regulation of Abiotic Stress Responses in Plants. *Frontiers in Plant Science* **8**,  
32 1564.

- 1 Herranz M.C., Navarro J.A., Sommen E. & Pallas V. (2015) Comparative analysis among  
2 the small RNA populations of source, sink and conductive tissues in two different  
3 plant-virus pathosystems. *BMC Genomics* **16**, 117.
- 4 Hewezi T., Léger M. & Gentzbittel L. (2008) A Comprehensive Analysis of the Combined  
5 Effects of High Light and High Temperature Stresses on Gene Expression in  
6 Sunflower. *Annals of Botany* **102**, 127–140.
- 7 Huang J., Li Z. & Zhao D. (2016) Deregulation of the OsmiR160 Target Gene OsARF18  
8 Causes Growth and Developmental Defects with an Alteration of Auxin Signaling in  
9 Rice. *Scientific Reports* **6**, 29938.
- 10 Jagadeeswaran G., Nimmakayala P., Zheng Y., Gowdu K., Reddy U.K. & Sunkar R. (2012)  
11 Characterization of the small RNA component of leaves and fruits from four  
12 different cucurbit species. *BMC Genomics* **13**, 329.
- 13 Jodder J., Basak S., Das R. & Kundu P. (2017) Coherent regulation of miR167a biogenesis  
14 and expression of auxin signaling pathway genes during bacterial stress in tomato.  
15 *Physiological and Molecular Plant Pathology* **100**, 97–105.
- 16 Jodder J., Das R., Sarkar D., Bhattacharjee P. & Kundu P. (2018) Distinct transcriptional  
17 and processing regulations control miR167a level in tomato during stress. *RNA*  
18 *Biology* **15**, 130–143.
- 19 Joshi G.A. nee, Chauhan C. & Das S. (2021) Sequence and functional analysis of MIR319  
20 promoter homologs from Brassica juncea reveals regulatory diversification and  
21 altered expression under stress. *Molecular Genetics and Genomics*.
- 22 Keleş Y. & Öncel I. (2002) Response of antioxidative defence system to temperature and  
23 water stress combinations in wheat seedlings. *Plant Science* **163**, 783–790.
- 24 Kim J.-S., Mizoi J., Kidokoro S., Maruyama K., Nakajima J., Nakashima K., ... Yamaguchi-  
25 Shinozaki K. (2012) &em>Arabidopsis&/em> GROWTH-REGULATING  
26 FACTOR7 Functions as a Transcriptional Repressor of Abscisic Acid– and Osmotic  
27 Stress–Responsive Genes, Including &em>DREB2A&/em>; *The Plant Cell*  
28 **24**, 3393 LP – 3405.
- 29 Kozomara A., Birgaoanu M. & Griffiths-Jones S. (2019) miRBase: from microRNA  
30 sequences to function. *Nucleic Acids Research* **47**, D155–D162.
- 31 Li J., Han S., Ding X., He T., Dai J., Yang S. & Gai J. (2015) Comparative Transcriptome  
32 Analysis between the Cytoplasmic Male Sterile Line NJCMS1A and Its Maintainer

- 1 NJCMS1B in Soybean (*Glycine max* (L.) Merr.). *PLOS ONE* **10**, e0126771.
- 2 Li N., Yang T., Guo Z., Wang Q., Chai M., Wu M., ... Zhang Z. (2020) Maize microRNA166  
3 Inactivation Confers Plant Development and Abiotic Stress Resistance.  
4 *International journal of molecular sciences* **21**, 9506.
- 5 Li X., Xia K., Liang Z., Chen K., Gao C. & Zhang M. (2016) MicroRNA393 is involved in  
6 nitrogen-promoted rice tillering through regulation of auxin signal transduction in  
7 axillary buds. *Scientific Reports* **6**, 32158.
- 8 Li Y., Lu Y.-G., Shi Y., Wu L., Xu Y.-J., Huang F., ... Wang W.-M. (2014) Multiple Rice  
9 MicroRNAs Are Involved in Immunity against the Blast Fungus *Magnaporthe*  
10 *oryzae*. *Plant Physiology* **164**, 1077–1092.
- 11 Liu Y., Li D., Yan J., Wang K., Luo H. & Zhang W. (2019) MiR319 mediated salt tolerance  
12 by ethylene. *Plant biotechnology journal* **17**, 2370–2383.
- 13 Livak K.J. & Schmittgen T.D. (2001) Analysis of Relative Gene Expression Data Using  
14 Real-Time Quantitative PCR and the  $2^{-\Delta\Delta CT}$  Method. *Methods* **25**, 402–408.
- 15 Love M.I., Huber W. & Anders S. (2014) Moderated estimation of fold change and  
16 dispersion for RNA-seq data with DESeq2. *Genome Biology* **15**, 550.
- 17 Lovell J.T., Mullen J.L., Lowry D.B., Awole K., Richards J.H., Sen S., ... McKay J.K. (2015)  
18 Exploiting Differential Gene Expression and Epistasis to Discover Candidate Genes  
19 for Drought-Associated QTLs in *Arabidopsis thaliana*; *The*  
20 *Plant Cell* **27**, 969 LP – 983.
- 21 Manavella P.A., Yang S.W. & Palatnik J. (2019) Keep calm and carry on: miRNA  
22 biogenesis under stress. *The Plant Journal* **99**, 832–843.
- 23 Matthews C., Arshad M. & Hannoufa A. (2019) Alfalfa response to heat stress is  
24 modulated by microRNA156. *Physiologia Plantarum* **165**, 830–842.
- 25 Megraw M., Cumbie J.S., Ivanchenko M.G. & Filichkin S.A. (2016) Small Genetic Circuits  
26 and MicroRNAs: Big Players in Polymerase II Transcriptional Control in Plants. *The*  
27 *Plant Cell* **28**, 286 LP – 303.
- 28 Meyers B.C., Axtell M.J., Bartel B., Bartel D.P., Baulcombe D., Bowman J.L., ... Zhu J.-K.  
29 (2008) Criteria for Annotation of Plant MicroRNAs. *The Plant Cell* **20**, 3186 LP –  
30 3190.
- 31 Mittler R. & Blumwald E. (2010) Genetic Engineering for Modern Agriculture: Challenges  
32 and Perspectives. *Annual Review of Plant Biology* **61**, 443–462.

- 1 Morales-Castilla I., García de Cortázar-Atauri I., Cook B.I., Lacombe T., Parker A., van  
2 Leeuwen C., ... Wolkovich E.M. (2020) Diversity buffers winegrowing regions from  
3 climate change losses. *Proceedings of the National Academy of Sciences of the*  
4 *United States of America* **117**, 2864–2869.
- 5 Ning L.-H., Du W., Song H.-N., Shao H.-B., Qi W.-C., Sheteiwiy M.S.A. & Yu D. (2019)  
6 Identification of responsive miRNAs involved in combination stresses of phosphate  
7 starvation and salt stress in soybean root. *Environmental and Experimental Botany*  
8 **167**, 103823.
- 9 Pollack F.G. & Uecker F.A. (1974) *Monosporascus cannonballus* an Unusual Ascomycete  
10 in Cantaloupe Roots. *Mycologia* **66**, 346–349.
- 11 Priya M., Dhanker O.P., Siddique K.H.M., HanumanthaRao B., Nair R.M., Pandey S., ...  
12 Nayyar H. (2019) Drought and heat stress-related proteins: an update about their  
13 functional relevance in imparting stress tolerance in agricultural crops. *Theoretical*  
14 *and Applied Genetics* **132**, 1607–1638.
- 15 Reis R.S., Eamens A.L. & Waterhouse P.M. (2015) Missing Pieces in the Puzzle of Plant  
16 MicroRNAs. *Trends in Plant Science* **20**, 721–728.
- 17 Rizhsky L., Liang H., Shuman J., Shulaev V., Davletova S. & Mittler R. (2004) When  
18 Defense Pathways Collide. The Response of Arabidopsis to a Combination of  
19 Drought and Heat Stress. *Plant Physiology* **134**, 1683–1696.
- 20 Robinson M.D. & Oshlack A. (2010) A scaling normalization method for differential  
21 expression analysis of RNA-seq data. *Genome Biology* **11**, R25.
- 22 Rosenzweig C., Elliott J., Deryng D., Ruane A.C., Müller C., Arneth A., ... Jones J.W. (2014)  
23 Assessing agricultural risks of climate change in the 21st century in a global gridded  
24 crop model intercomparison. *Proceedings of the National Academy of Sciences*  
25 **111**, 3268 LP – 3273.
- 26 Rossel J.B., Wilson P.B., Hussain D., Woo N.S., Gordon M.J., Mewett O.P., ... Pogson B.J.  
27 (2007) Systemic and Intracellular Responses to Photooxidative Stress in  
28 Arabidopsis. *The Plant Cell* **19**, 4091–4110.
- 29 Rubio-Somoza I. & Weigel D. (2011) MicroRNA networks and developmental plasticity in  
30 plants. *Trends in Plant Science* **16**, 258–264.
- 31 Samad A.F.A., Sajad M., Nazaruddin N., Fauzi I.A., Murad A.M.A., Zainal Z. & Ismail I.  
32 (2017) MicroRNA and Transcription Factor: Key Players in Plant Regulatory

- 1 Network. *Frontiers in plant science* **8**, 565.
- 2 Sanz-Carbonell A., Marques M.C., Bustamante A., Fares M.A., Rodrigo G. & Gomez G.  
3 (2019a) Inferring the regulatory network of the miRNA-mediated response to  
4 biotic and abiotic stress in melon. *BMC Plant Biology* **19**.
- 5 Sanz-Carbonell A., Marques M.C., Martinez G. & Gomez G. (2019b) Dynamic  
6 architecture and regulatory implications of the miRNA network underlying the  
7 response to stress in melon. *RNA Biology*, 1–17.
- 8 Sattar S., Song Y., Anstead J.A., Sunkar R. & Thompson G.A. (2012) Cucumis melo  
9 MicroRNA Expression Profile During Aphid Herbivory in a Resistant and Susceptible  
10 Interaction. *Molecular Plant-Microbe Interactions*® **25**, 839–848.
- 11 Shi X.P., Jiang F.L., Wen J.Q., Cui S.Y., Zhou Y.Z. & Wu Z. (2019) MicroRNA319 family  
12 members play an important role in Solanum habrochaites and S. lycopersicum  
13 responses to chilling and heat stresses. *Biologia plantarum* **63**, 200–209.
- 14 Song X., Li Y., Cao X. & Qi Y. (2019) MicroRNAs and Their Regulatory Roles in Plant–  
15 Environment Interactions. *Annual Review of Plant Biology* **70**, 489–525.
- 16 Sun Y., Niu X. & Fan M. (2017) Genome-wide identification of cucumber green mottle  
17 mosaic virus-responsive microRNAs in watermelon. *Archives of Virology* **162**,  
18 2591–2602.
- 19 Suzuki N., Rizhsky L., Liang H., Shuman J., Shulaev V. & Mittler R. (2005) Enhanced  
20 Tolerance to Environmental Stress in Transgenic Plants Expressing the  
21 Transcriptional Coactivator Multiprotein Bridging Factor 1c. *Plant Physiology* **139**,  
22 1313–1322.
- 23 Tang J. & Chu C. (2017) MicroRNAs in crop improvement: fine-tuners for complex traits.  
24 *Nature Plants* **3**, 17077.
- 25 Tarazona S., Furió-Tarí P., Turrà D., Pietro A. Di, Nueda M.J., Ferrer A. & Conesa A.  
26 (2015) Data quality aware analysis of differential expression in RNA-seq with  
27 NOISeq R/Bioc package. *Nucleic Acids Research* **43**, e140–e140.
- 28 Wang Y., Feng C., Zhai Z., Peng X., Wang Y., Sun Y., ... Li T. (2020) The Apple microR171i-  
29 SCARECROW-LIKE PROTEINS26.1 Module Enhances Drought Stress Tolerance by  
30 Integrating Ascorbic Acid Metabolism. *Plant Physiology* **184**, 194–211.
- 31 Wu F., Qi J., Meng X. & Jin W. (2020) miR319c acts as a positive regulator of tomato  
32 against Botrytis cinerea infection by targeting TCP29. *Plant Science* **300**, 110610.

- 1 Xie S., Jiang H., Xu Z., Xu Q. & Cheng B. (2017) Small RNA profiling reveals important  
2 roles for miRNAs in Arabidopsis response to *Bacillus velezensis* FZB42. *Gene* **629**,  
3 9–15.
- 4 Xu J., Hou Q.M., Khare T., Verma S.K. & Kumar V. (2019) Exploring miRNAs for  
5 developing climate-resilient crops: A perspective review. *Science of the Total*  
6 *Environment* **653**, 91–104.
- 7 Yang J.H., Han S.J., Yoon E.K. & Lee W.S. (2006) ‘Evidence of an auxin signal pathway,  
8 microRNA167-ARF8-GH3, and its response to exogenous auxin in cultured rice  
9 cells.’ *Nucleic Acids Research* **34**, 1892–1899.
- 10 Zhang B. (2015) MicroRNA: a new target for improving plant tolerance to abiotic stress.  
11 *Journal of experimental botany* **66**, 1749–1761.
- 12 Zhang H. & Sonnewald U. (2017) Differences and commonalities of plant responses to  
13 single and combined stresses. *The Plant Journal* **90**, 839–855.
- 14 Zhao Y., Xie J., Wang S., Xu W., Chen S., Song X., ... Zhang D. (2021) Synonymous  
15 mutation of miR396a target sites in Growth Regulating Factor 15 (GRF15)  
16 enhances photosynthetic efficiency and heat tolerance in poplar. *Journal of*  
17 *Experimental Botany*.
- 18 Zhou M. & Tang W. (2019) MicroRNA156 amplifies transcription factor-associated cold  
19 stress tolerance in plant cells. *Molecular Genetics and Genomics* **294**, 379–393.
- 20 Zhou R., Yu X., Ottosen C.-O., Zhang T., Wu Z. & Zhao T. (2020) Unique miRNAs and their  
21 targets in tomato leaf responding to combined drought and heat stress. *BMC plant*  
22 *biology* **20**, 107.
- 23 Zhu Y.-X., Jia J.-H., Yang L., Xia Y.-C., Zhang H.-L., Jia J.-B., ... Liu L.-C. (2019) Identification  
24 of cucumber circular RNAs responsive to salt stress. *BMC Plant Biology* **19**, 164.  
25

## 1 FIGURE LEGENDS

2 **FIGURE 1 Analysis** of the sRNA populations. (a) PCA based on sRNAs accumulation in  
3 three biological replicates of melon plants exposed to the six stress combined  
4 treatments and controls. The statistical significance ( $p = 5.886 \times 10^{-14}$ ) was estimated by  
5 Mann-Whitney-Wilcoxon test, considering the inter- and intra-group Euclidean  
6 distances. (b) Diagram showing the relative accumulation (and distribution of the total  
7 clean reads of melon sRNAs ranging between 20 - 25 nt obtained from the analyzed  
8 sequenced libraries. The control and the different analyzed treatments are represented  
9 with colors. The shown values represent the sum of all repetitions. Bars indicate the  
10 standard error. (c) Graphic representation of the expression values (estimated by  
11 edgeR) of sRNA sequences recovered from melon exposed to different stress  
12 conditions. The dots indicate the expression value of each sRNA. Red and blue dots  
13 indicate significant values for differential expression with  $|\log_2 FC| \geq 1.25$ , respectively.  
14 Grey dots indicate sRNAs with non-significant differential expression.

15  
16 **FIGURE 2 General** description of stress-responsive miRNA families. (a) Boxplot  
17 analysis showing the general expression value observed for each miRNA-family  
18 member. To determine the general sense of the expression for each miRNA family we  
19 employed the median value of expression (represented by internal box-line) estimated  
20 by boxplot analysis of all family-related sequences. The differential expression values  
21 represented in the figure correspond to the  $\log_2 FC$  obtained using edgeR. (b) Heatmap  
22 of 22 miRNAs differentially expressed in melon in response to combined stress. The  
23 differential expression values represented correspond to the median of the  $\log_2 FC$   
24 values obtained using edgeR for each miRNA family. (c) Scatter plot showing the  
25 significant negative correlation (estimated by Pearson correlation coefficient) between  
26 the expression levels of 16 selected stress-responsive miRNAs with differential  
27 accumulation determined by sequencing and the accumulation of their targets in the  
28 corresponding stress conditions, estimated by RT-qPCR.

29  
30 **FIGURE 3 Effects** of the stresses combination onto the accumulation rate of stress  
31 responsive miRNAs. (a) Graphic representation of the mean percentage for the six  
32 analyzed treatments of miRNA related reads that exhibit additive (grey) or non-additive  
33 (black) response to combined stress conditions in comparison to single stresses  
34 considering unique reads (left columns), total reads (central columns) and miRNA  
35 families (right). Bars represent the standard error between means. (b) Detail of the  
36 global response rate in each stress condition considering the two (positive or negative)  
37 type of possible non-additive response to combined stresses. (c) Volcano plot showing  
38 significant positive (green dots) and negative (red dots)  $SCE$  values obtained for each  
39 miRNA-related read, in response to each combined stress condition. miRNAs with non-  
40 significant deviations from the additive null model are in grey. More detailed  
41 information is provided in the Table S6B.



1  
2 **FIGURE 4 Members** of each miRNA family respond in a coordinated manner to  
3 combined stresses. (a) Boxplot analysis showing the *SCE* values for family-miRNA  
4 related members in each combined stress condition. To determine the general sense of  
5 the effect induced by combined stresses for each miRNA family we employed the  
6 median of the *SCE* values obtained for the totality of the family members (represented  
7 by internal box-line). (b) Graphic representation of the global non-additive positive  
8 (green) or negative (red) effects associated to combined stresses estimated for each  
9 miRNA family in the six stress conditions analyzed here. The number of combined  
10 stresses that induce positive and/or negative non-additive responses in each miRNA  
11 family is detailed in the right columns. The proportion of miRNA families with non-  
12 additive effects in response to each combined stresses is detailed below.

13  
14 **FIGURE 5 Biological** functions of miRNAs with non-additive response to combined  
15 stresses. (a) Dendrogram showing the clustering of miRNAs families with at least a  
16 member with significant non-additive response to combined stresses in three main  
17 groups according to their *SCE* values in the analyzed stress conditions. The global  
18 statistical significance of the identified clusters ( $p = 8.88 \times 10^{-22}$ ) was estimated by Mann-  
19 Whitney-Wilcoxon test, considering the inter- and intra-group Euclidean distances. The  
20 lower panel shows the response range determined for each miRNA family in response  
21 to single stresses with both biotic and abiotic source (using a color scale). (b)  
22 Description and detailed information of the targets for miRNAs with significant non-  
23 additive response to combined stresses identified in melon plants. The GO terms were  
24 estimated in base to information of homologous transcripts in *A. thaliana*.

25  
26 **FIGURE 6** Proposed model to explain predominant non-additive response in certain  
27 miRNAs families. (a) Simplified graphic representation of the proposed miRNA-  
28 mediated network of response to stress in melon (Sanz-Carbonell et al., 2019; Sanz-  
29 Carbonell, Marques, Martinez & Gomez, 2020). Blue nodes represent highly connected  
30 miRNAs with a broad response range to biotic and/or abiotic stress conditions  
31 (*generalists*). Orange nodes represent miRNAs reactive to specific stress conditions  
32 (*specialists*). (b) When the network is exposed to double or triple stress conditions is  
33 expected that the stresses combinations should not affect specialist miRNAs (poorly  
34 connected between them) and consequently they exhibit additive *SCE* values  
35 (comparable to the resultant of the sum of both individual responses). In contrast,  
36 generalist miRNAs (highly interconnected) respond to stresses combination in a  
37 differential (non-additive) manner, related to each stress combination.

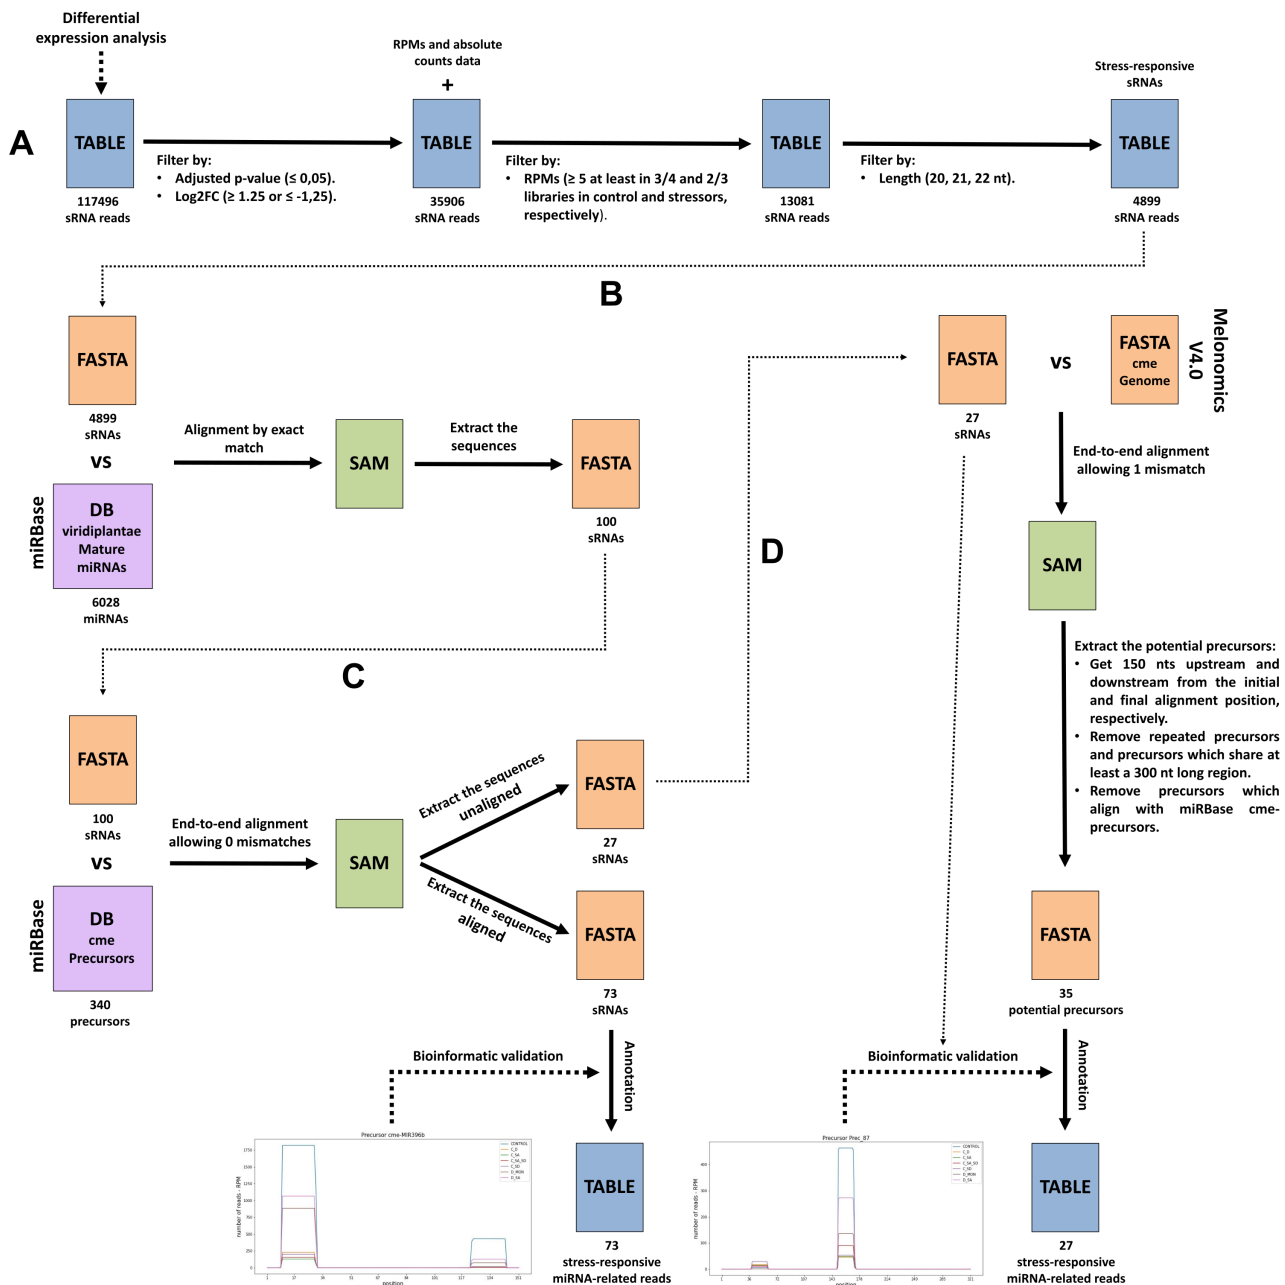

**Figure S1. Pipeline for miRNA detection.** **A** sRNA reads data coming from the differential expression analysis were filtered by adjusted p-value, log2FoldChange, RPMs and length to get the stress-responsive sRNA reads; **B** Stress-responsive sRNAs were aligned by exact match on viridiplantae mature miRNAs deposited in miRBase; **C** Stress-responsive sRNAs matched in the previous step were aligned on the cucumis melo precursors deposited in miRBase without allowing mismatches. The aligned sequences were bioinformatically validated and annotated as miRNA to be used in this work; **D** Stress-responsive sRNAs unaligned in the previous step were aligned on the cucumis melo genome regarding biological variability, that is, allowing 1 mismatch. Then, we looked for potential precursors which were used to bioinformatically validate the sequences as miRNA. These sequences were annotated taking into account only the miRNA family of the viridiplantae mature miRNA on which aligned in the step B.

**Cold-Drought**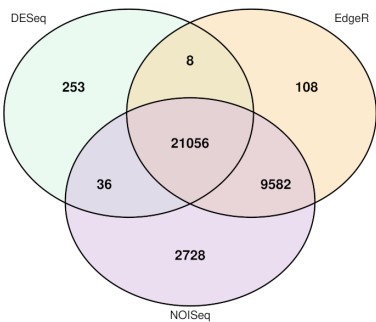**Cold-Salinity**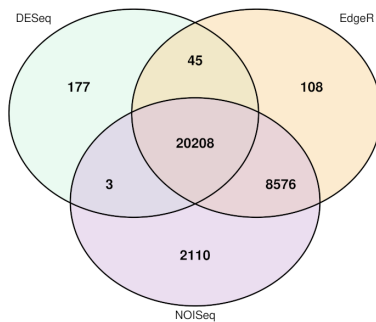**Cold-Short Day**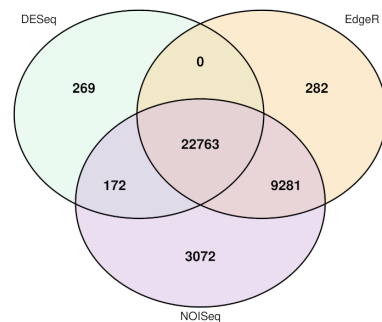**Drought-Monosporascus**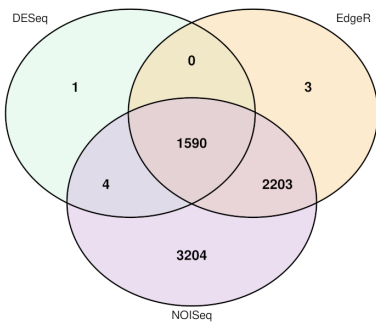**Drought-Salinity**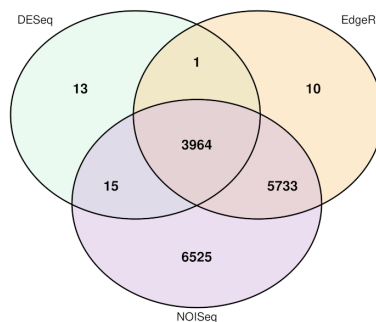**Cold-Salinity-Short Day**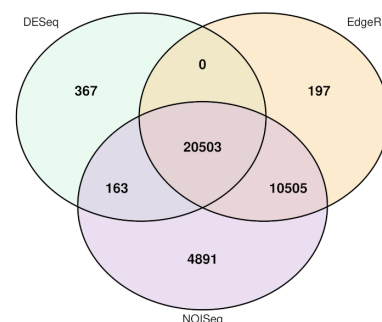

**Figure S2: Analysis of stress-responsive miRNAs.** Venn diagram comparing the number of the differential sRNAs - estimated by DESeq2 (green), edgeR (orange) and NOISeq (magenta)- expressed in melon in response to combined stress conditions. Only the sRNAs predicted as differential by all three analysis methods were considered as true stress-responsive miRNAs.

**Table S1:** Detail of the combined stress treatments used in this work.

| Stress Conditions              | Treatments at 11 days post emergency                                                                                                |                                                                                                                                            | sample collection              |
|--------------------------------|-------------------------------------------------------------------------------------------------------------------------------------|--------------------------------------------------------------------------------------------------------------------------------------------|--------------------------------|
| <i>Cold Drought</i>            | Irrigated with 50 ml Hoagland's solution<br>20 °C/16 h-light --- 14 °C/8 h-darkness                                                 | Except for drought combined treatments plants were irrigated alternatively (water and Hoagland's solution) by inundation (1500 mL / 48 hs) | 11 days afetr stress treatment |
| <i>Drought Salinity</i>        | Irrigated with 50 ml of LiCl (200 mM)<br>28 °C/16 h-light --- 20 °C/8 h-darkness                                                    |                                                                                                                                            |                                |
| <i>Cold Salinity</i>           | Irrigated with 50 ml of LiCl (200 mM)<br>20 °C/16 h-light --- 14 °C/8 h-darkness                                                    |                                                                                                                                            |                                |
| <i>Cold Short-day</i>          | Irrigated with 50 ml Hoagland's solution<br>20 °C/8 h-light --- 14 °C/16 h-darkness                                                 |                                                                                                                                            |                                |
| <i>Drought Monosporascus</i>   | Irrigated with 50 ml Hoagland's solution plus <i>M. cannonballus</i> mycelium (1000 UFC)<br>28 °C/16 h-light --- 20 °C/8 h-darkness |                                                                                                                                            |                                |
| <i>Cold Salinity Short-day</i> | Irrigated with 50 ml of LiCl (200 mM)<br>20 °C/8 h-light --- 14 °C/16 h-darkness                                                    |                                                                                                                                            |                                |
| <i>Control</i>                 | Irrigated with 50 ml Hoagland's solution<br>28 °C/16 h-light --- 20 °C/8 h-darkness                                                 |                                                                                                                                            |                                |

**Table S2:**

Detailed information of control and stress combined libraries of Cucumis melo by sRNA length.

| Sample     | sRNA length | Library size | Unique sRNAs | Absolute counts | RPMS      | Percentage |
|------------|-------------|--------------|--------------|-----------------|-----------|------------|
| Control-2  | 20          | 3254890      | 89809        | 207400          | 63719.51  | 6.37       |
|            | 21          | 3254890      | 162375       | 462799          | 142185.76 | 14.22      |
|            | 22          | 3254890      | 158651       | 481894          | 148052.32 | 14.81      |
|            | 23          | 3254890      | 231972       | 563459          | 173111.53 | 17.31      |
|            | 24          | 3254890      | 868012       | 1333057         | 409555.16 | 40.96      |
| 25         | 3254890     | 84481        | 206281       | 63375.72        | 6.34      |            |
| Control-3  | 20          | 3638337      | 97378        | 199305          | 54779.15  | 5.48       |
|            | 21          | 3638337      | 174735       | 464258          | 127601.70 | 12.76      |
|            | 22          | 3638337      | 169323       | 537064          | 147612.49 | 14.76      |
|            | 23          | 3638337      | 254739       | 787518          | 216449.99 | 21.64      |
|            | 24          | 3638337      | 931871       | 1443990         | 396881.87 | 39.69      |
| 25         | 3638337     | 84280        | 206202       | 56674.79        | 5.67      |            |
| Control-4  | 20          | 4120101      | 110825       | 218788          | 53102.58  | 5.31       |
|            | 21          | 4120101      | 220779       | 598124          | 145172.17 | 14.52      |
|            | 22          | 4120101      | 217821       | 625048          | 151706.96 | 15.17      |
|            | 23          | 4120101      | 326044       | 596350          | 144741.60 | 14.47      |
|            | 24          | 4120101      | 1180433      | 1847971         | 448525.66 | 44.85      |
| 25         | 4120101     | 109378       | 233820       | 56751.04        | 5.68      |            |
| Control-5  | 20          | 3099997      | 74339        | 168072          | 54216.83  | 5.42       |
|            | 21          | 3099997      | 147609       | 441991          | 142577.88 | 14.26      |
|            | 22          | 3099997      | 140915       | 478706          | 154421.44 | 15.44      |
|            | 23          | 3099997      | 201649       | 685367          | 221086.34 | 22.11      |
|            | 24          | 3099997      | 746109       | 1147989         | 370319.39 | 37.03      |
| 25         | 3099997     | 68633        | 177872       | 57378.12        | 5.74      |            |
| C-D-1      | 20          | 3535271      | 93672        | 256127          | 72449.04  | 7.24       |
|            | 21          | 3535271      | 163192       | 510797          | 144485.95 | 14.45      |
|            | 22          | 3535271      | 163994       | 420383          | 118911.11 | 11.89      |
|            | 23          | 3535271      | 220670       | 420602          | 118973.06 | 11.90      |
|            | 24          | 3535271      | 790983       | 1488819         | 421132.92 | 42.11      |
| 25         | 3535271     | 91011        | 438543       | 124047.92       | 12.40     |            |
| C-D-2      | 20          | 4476774      | 103973       | 231692          | 51754.23  | 5.18       |
|            | 21          | 4476774      | 199393       | 571488          | 127656.21 | 12.77      |
|            | 22          | 4476774      | 202429       | 535414          | 119598.17 | 11.96      |
|            | 23          | 4476774      | 273691       | 470427          | 105081.69 | 10.51      |
|            | 24          | 4476774      | 1058297      | 2178447         | 486610.89 | 48.66      |
| 25         | 4476774     | 103661       | 489306       | 109298.79       | 10.93     |            |
| C-D-3      | 20          | 3167043      | 83415        | 188210          | 59427.67  | 5.94       |
|            | 21          | 3167043      | 153710       | 447131          | 141182.48 | 14.12      |
|            | 22          | 3167043      | 151266       | 367009          | 115883.81 | 11.59      |
|            | 23          | 3167043      | 209855       | 340067          | 107376.82 | 10.74      |
|            | 24          | 3167043      | 803346       | 1508164         | 476205.72 | 47.62      |
| 25         | 3167043     | 77164        | 316462       | 99923.49        | 9.99      |            |
| C-Sal-1    | 20          | 3278670      | 89001        | 250067          | 76270.87  | 7.63       |
|            | 21          | 3278670      | 143661       | 441926          | 134788.19 | 13.48      |
|            | 22          | 3278670      | 139630       | 367317          | 112032.32 | 11.20      |
|            | 23          | 3278670      | 185759       | 345986          | 105526.33 | 10.55      |
|            | 24          | 3278670      | 730135       | 1444632         | 440615.25 | 44.06      |
| 25         | 3278670     | 74762        | 428742       | 130767.05       | 13.08     |            |
| C-Sal-2    | 20          | 3711038      | 96057        | 271341          | 73117.28  | 7.31       |
|            | 21          | 3711038      | 165605       | 650909          | 175398.10 | 17.54      |
|            | 22          | 3711038      | 162507       | 452190          | 121850.01 | 12.19      |
|            | 23          | 3711038      | 203520       | 437013          | 117760.31 | 11.78      |
|            | 24          | 3711038      | 765211       | 1569523         | 422933.69 | 42.29      |
| 25         | 3711038     | 64200        | 330062       | 88940.61        | 8.89      |            |
| C-Sal-3    | 20          | 2913493      | 78960        | 242703          | 83303.10  | 8.33       |
|            | 21          | 2913493      | 126927       | 446263          | 153171.12 | 15.32      |
|            | 22          | 2913493      | 126205       | 348426          | 119590.47 | 11.96      |
|            | 23          | 2913493      | 158297       | 317634          | 109021.71 | 10.90      |
|            | 24          | 2913493      | 610326       | 1207434         | 414428.32 | 41.44      |
| 25         | 2913493     | 62263        | 351033       | 120485.27       | 12.05     |            |
| C-SD-1     | 20          | 4349145      | 111312       | 239944          | 55170.38  | 5.52       |
|            | 21          | 4349145      | 198300       | 525716          | 120878.01 | 12.09      |
|            | 22          | 4349145      | 198651       | 506734          | 116513.48 | 11.65      |
|            | 23          | 4349145      | 277124       | 465703          | 107079.21 | 10.71      |
|            | 24          | 4349145      | 1006814      | 2085161         | 479441.59 | 47.94      |
| 25         | 4349145     | 100915       | 525887       | 120917.33       | 12.09     |            |
| C-SD-2     | 20          | 4070723      | 101751       | 230724          | 56678.87  | 5.67       |
|            | 21          | 4070723      | 176838       | 470250          | 115520.02 | 11.55      |
|            | 22          | 4070723      | 183424       | 475225          | 116742.16 | 11.67      |
|            | 23          | 4070723      | 247979       | 427667          | 105059.22 | 10.51      |
|            | 24          | 4070723      | 916867       | 1884761         | 463003.99 | 46.30      |
| 25         | 4070723     | 101174       | 582096       | 142995.73       | 14.30     |            |
| C-SD-3     | 20          | 3060927      | 86503        | 227480          | 74317.36  | 7.43       |
|            | 21          | 3060927      | 146348       | 400929          | 130982.87 | 13.10      |
|            | 22          | 3060927      | 147836       | 408285          | 133386.06 | 13.34      |
|            | 23          | 3060927      | 192491       | 342739          | 111972.29 | 11.20      |
|            | 24          | 3060927      | 676210       | 1305283         | 426433.89 | 42.64      |
| 25         | 3060927     | 62608        | 376211       | 122907.54       | 12.29     |            |
| D-Mon-1    | 20          | 3434896      | 72864        | 152880          | 44507.90  | 4.45       |
|            | 21          | 3434896      | 130959       | 460929          | 134190.09 | 13.42      |
|            | 22          | 3434896      | 144473       | 521031          | 151687.56 | 15.17      |
|            | 23          | 3434896      | 234176       | 687786          | 200234.88 | 20.02      |
|            | 24          | 3434896      | 883783       | 1436127         | 418099.12 | 41.81      |
| 25         | 3434896     | 73586        | 176143       | 51280.45        | 5.13      |            |
| D-Mon-2    | 20          | 2621444      | 62174        | 128036          | 48841.78  | 4.88       |
|            | 21          | 2621444      | 111173       | 355345          | 135553.15 | 13.56      |
|            | 22          | 2621444      | 115707       | 372087          | 141939.71 | 14.19      |
|            | 23          | 2621444      | 189409       | 570932          | 217792.94 | 21.78      |
|            | 24          | 2621444      | 727440       | 1083621         | 413367.98 | 41.34      |
| 25         | 2621444     | 56567        | 111423       | 42504.44        | 4.25      |            |
| D-Mon-3    | 20          | 3649484      | 77741        | 159240          | 43633.57  | 4.36       |
|            | 21          | 3649484      | 144625       | 434673          | 119105.33 | 11.91      |
|            | 22          | 3649484      | 161018       | 451040          | 123590.07 | 12.36      |
|            | 23          | 3649484      | 278741       | 713213          | 195428.45 | 19.54      |
|            | 24          | 3649484      | 1073308      | 1716823         | 470428.97 | 47.04      |
| 25         | 3649484     | 90693        | 174495       | 47813.61        | 4.78      |            |
| D-Mon-4    | 20          | 4253376      | 214434       | 224374          | 52751.98  | 5.28       |
|            | 21          | 4253376      | 214434       | 551760          | 129722.84 | 12.97      |
|            | 22          | 4253376      | 213687       | 568311          | 133614.10 | 13.36      |
|            | 23          | 4253376      | 297266       | 572260          | 134542.54 | 13.45      |
|            | 24          | 4253376      | 1298718      | 2106407         | 495231.79 | 49.52      |
| 25         | 4253376     | 124654       | 230264       | 54136.76        | 5.41      |            |
| D-Sal-2    | 20          | 3585226      | 106153       | 244490          | 68193.75  | 6.82       |
|            | 21          | 3585226      | 171457       | 471700          | 131567.72 | 13.16      |
|            | 22          | 3585226      | 173928       | 476265          | 132841.00 | 13.28      |
|            | 23          | 3585226      | 243561       | 422040          | 117716.43 | 11.77      |
|            | 24          | 3585226      | 932902       | 1753949         | 489215.74 | 48.92      |
| 25         | 3585226     | 114080       | 216782       | 60465.37        | 6.05      |            |
| D-Sal-3    | 20          | 3444560      | 104040       | 233128          | 67680.05  | 6.77       |
|            | 21          | 3444560      | 171156       | 489739          | 142177.52 | 14.22      |
|            | 22          | 3444560      | 167156       | 430935          | 125105.96 | 12.51      |
|            | 23          | 3444560      | 228695       | 393395          | 114207.62 | 11.42      |
|            | 24          | 3444560      | 902364       | 1696530         | 492524.44 | 49.25      |
| 25         | 3444560     | 105199       | 200833       | 58304.40        | 5.83      |            |
| C-Sal-SD-1 | 20          | 4138669      | 101646       | 216941          | 52418.06  | 5.24       |
|            | 21          | 4138669      | 192739       | 557918          | 134806.14 | 13.48      |
|            | 22          | 4138669      | 185482       | 448279          | 108314.77 | 10.83      |
|            | 23          | 4138669      | 264682       | 435175          | 105148.54 | 10.51      |
|            | 24          | 4138669      | 1110437      | 2255499         | 544981.73 | 54.50      |
| 25         | 4138669     | 84308        | 224857       | 54330.75        | 5.43      |            |
| C-Sal-SD-2 | 20          | 4483072      | 86074        | 220464          | 49176.99  | 4.92       |
|            | 21          | 4483072      | 178532       | 576425          | 128578.13 | 12.86      |
|            | 22          | 4483072      | 179899       | 462350          | 103132.41 | 10.31      |
|            | 23          | 4483072      | 255651       | 447117          | 99734.51  | 9.97       |
|            | 24          | 4483072      | 1154005      | 2306011         | 514381.88 | 51.44      |
| 25         | 4483072     | 97719        | 470705       | 104996.08       | 10.50     |            |
| C-Sal-SD-3 | 20          | 4333858      | 94571        | 225872          | 52118.00  | 5.21       |
|            | 21          | 4333858      | 185569       | 592924          | 136812.05 | 13.68      |
|            | 22          | 4333858      | 180488       | 445661          | 102832.40 | 10.28      |
|            | 23          | 4333858      | 245468       | 430304          | 99288.90  | 9.93       |
|            | 24          | 4333858      | 1107161      | 2254538         | 520215.01 | 52.02      |
| 25         | 4333858     | 97867        | 384559       | 88733.64        | 8.87      |            |

bioRxiv preprint doi: <https://doi.org/10.1101/2021.07.20.454429>; this version posted July 31, 2021. The copyright holder for this preprint (which was not certified by peer review) is the author/funder, who has granted bioRxiv a license to display the preprint in perpetuity. It is made available under aCC-BY-NC-ND 4.0 International license.

**Table S3:**

Log2FC values and FDR adjusted p-values of stress-responsive cucumis melo miRNAs in stress combined conditions.

| Family            | Sequence               | Log2FC  |         |         |         |         |          | FDR adjusted p-value |            |            |            |            |            |
|-------------------|------------------------|---------|---------|---------|---------|---------|----------|----------------------|------------|------------|------------|------------|------------|
|                   |                        | C-D     | C-Sal   | C-SD    | D-Mon   | D-Sal   | C-Sal-SD | C-D                  | C-Sal      | C-SD       | D-Mon      | D-Sal      | C-Sal-SD   |
| <b>miR1515</b>    | TCATTTTTCGCGTCAATGATCC | -1.8262 | -1.9106 | -1.8672 | -1.5612 | -0.6802 | -2.0549  | 2.4333e-03           | 1.6924e-03 | 1.3012e-03 | 5.5093e-02 | 3.2758e-01 | 1.1276e-04 |
| <b>miR156</b>     | TGACAGAAGAGAGTGAGCACT  | -3.852  | -3.6551 | -3.8516 | -1.3276 | -1.235  | -4.037   | 5.7326e-16           | 8.7426e-15 | 4.7611e-18 | 5.8087e-03 | 2.1434e-02 | 3.1497e-18 |
|                   | TGCTCACTTCTCTTCTTGTGAG | -1.7851 | -2.1303 | -1.8749 | -0.9603 | -1.1438 | -2.7107  | 5.5427e-04           | 1.8686e-04 | 1.5049e-04 | 1.6838e-01 | 6.4678e-02 | 5.6477e-08 |
|                   | GCTCACTTCTCTTCTTGTGAG  | -2.2318 | -2.3383 | -2.7823 | -1.3058 | -1.1776 | -1.8136  | 5.8696e-05           | 2.3950e-05 | 1.7064e-05 | 9.4235e-02 | 1.9136e-01 | 1.5807e-03 |
|                   | TTGACAGAAGATAGAGGGCAC  | -0.7439 | -0.3275 | -0.645  | 0.2777  | 1.4721  | -0.8092  | 1.0537e-01           | 4.4855e-01 | 1.2759e-01 | 7.2673e-01 | 6.2662e-03 | 5.4992e-02 |
|                   | TGACAGAAGAGAGTGAGCACT  | -1.2787 | -0.912  | -1.398  | -0.9811 | -0.6568 | -1.5966  | 8.4494e-03           | 3.1382e-02 | 1.6810e-03 | 9.3765e-02 | 2.6485e-01 | 1.4953e-03 |
|                   | TTGACAGAAGAGAGTGAGCACT | -2.3495 | -1.645  | -2.5472 | -0.8108 | -0.2241 | -2.4068  | 2.1497e-06           | 1.0136e-04 | 1.7616e-08 | 2.0214e-01 | 7.4925e-01 | 1.8429e-05 |
|                   | TGACAGAAGATAGAGAGCAC   | -6.2138 | -4.4624 | -4.0245 | -1.6462 | -1.0163 | -3.3916  | 7.6816e-10           | 6.7234e-08 | 2.1738e-08 | 5.7382e-02 | 1.2845e-01 | 2.3747e-07 |
|                   | TTGACAGAAGATAGAGAGCAC  | -3.2796 | -3.2847 | -3.0934 | -1.8759 | -1.0704 | -2.5633  | 2.4183e-08           | 2.8743e-11 | 4.7029e-08 | 7.0232e-04 | 9.1677e-02 | 2.9132e-06 |
|                   | TGACAGAAGAGAGTGAGCACA  | -1.5586 | -1.844  | -1.5482 | -1.2227 | -1.1955 | -1.8364  | 4.6489e-04           | 1.6199e-05 | 1.0970e-03 | 2.2795e-02 | 2.9432e-02 | 1.0031e-03 |
| <b>miR157</b>     | GCTCTCTATGCTTCTGTCTATC | -4.5129 | -4.9225 | -4.78   | -1.9084 | -3.4278 | -5.7726  | 9.0220e-14           | 4.5197e-16 | 7.0493e-17 | 1.3931e-03 | 4.7131e-08 | 7.3458e-19 |
|                   | GCTCTCTATACTTCTGTCCACC | -1.122  | -1.6962 | -1.5651 | 0.3775  | -0.3078 | -2.4942  | 1.7788e-02           | 2.0262e-04 | 5.3437e-04 | 6.2826e-01 | 6.9246e-01 | 1.4036e-07 |
|                   | GCTCTCTATGCTTCTGTCTATC | -3.1474 | -3.6727 | -3.8442 | -2.2688 | -2.8072 | -4.8361  | 6.5879e-08           | 6.5059e-10 | 1.1643e-11 | 1.5751e-04 | 1.9114e-05 | 4.4540e-15 |
| <b>miR159</b>     | TTGGATTGAAGGGAGCTCTT   | -2.153  | -2.2499 | -2.4728 | -0.8663 | 0.2274  | -2.2786  | 6.6336e-05           | 3.6571e-06 | 1.4189e-07 | 2.0174e-01 | 7.6088e-01 | 8.2052e-07 |
|                   | CTTGGATTGAAGGGAGCTCTT  | -0.8226 | -0.9327 | -1.5558 | -1.0634 | 0.2216  | -0.5983  | 8.7480e-02           | 8.2433e-02 | 7.3806e-04 | 1.7242e-01 | 7.7381e-01 | 2.1470e-01 |
|                   | TTGGATTGAAGGGAGCTCCT   | -2.9147 | -2.3173 | -3.3123 | -0.3582 | -1.1474 | -2.3209  | 8.1638e-05           | 1.5891e-03 | 6.8199e-05 | 7.7770e-01 | 1.7043e-01 | 5.5147e-04 |
|                   | TTGGATTGAAGGGAGCTCTG   | -1.4621 | -2.4859 | -2.6794 | -2.0315 | 0.2642  | -1.7627  | 6.2916e-02           | 7.1098e-04 | 1.4787e-04 | 1.9548e-02 | 8.6141e-01 | 1.4646e-02 |
|                   | GAGCTCTTGAAGTCCAATAG   | 0.1227  | -0.235  | 0.114   | -1.4935 | -1.9774 | -1.8173  | 8.5483e-01           | 7.0936e-01 | 8.5846e-01 | 1.0707e-01 | 8.8960e-03 | 3.0638e-03 |
|                   | TTGGATTGAAGGGAGCTCTC   | -2.6205 | -2.724  | -2.9943 | -0.6241 | 0.3101  | -2.0466  | 4.1190e-05           | 3.1332e-06 | 1.0684e-06 | 5.4728e-01 | 7.1944e-01 | 3.1048e-04 |
| <b>miR159(nc)</b> | AGCTGTAAAGCTATGGATCC   | 2.4394  | 0.9465  | 2.1398  | NA      | NA      | 0.1883   | 2.5369e-04           | 1.3140e-01 | 7.4427e-05 | NA         | NA         | 8.1600e-01 |
| <b>miR160</b>     | TGCTTGGTCCCTGTATGCC    | -0.1131 | 0.2115  | -0.8248 | -1.1101 | -1.4337 | -0.9296  | 8.7258e-01           | 7.7901e-01 | 6.9342e-02 | 1.4991e-01 | 2.9815e-02 | 8.8623e-02 |
|                   | TGCTTGGTCCCTGTATGCCA   | -1.6692 | -1.6329 | -2.694  | -1.5736 | -2.669  | -1.0826  | 2.5241e-03           | 2.3227e-02 | 9.7277e-08 | 1.2886e-02 | 4.5156e-04 | 5.2117e-02 |
| <b>miR162</b>     | TCGATAAGCCTCTGCATCCAG  | 0.9192  | 0.7431  | 1.5199  | -0.5593 | 0.2844  | 0.6013   | 8.6547e-02           | 2.5583e-01 | 1.0492e-03 | 6.4663e-01 | 7.4310e-01 | 3.3250e-01 |
|                   | TTGATAAACCTCTGCATCCAG  | 2.0154  | 1.2086  | 2.2584  | NA      | NA      | 0.748    | 5.8872e-04           | 9.4579e-02 | 1.7674e-05 | NA         | NA         | 2.5427e-01 |
| <b>miR164</b>     | TGGAGAAGCAGGGCAGCTGCT  | -2.7194 | -2.7283 | -4.054  | -1.027  | -1.0959 | -3.0971  | 1.8736e-06           | 7.2653e-07 | 1.7176e-11 | 1.8939e-01 | 1.4688e-01 | 2.6696e-08 |
|                   | TGGAGAAGCAGGGCAGCTGCA  | -0.7977 | -1.373  | -1.066  | -0.976  | -0.1509 | -0.738   | 8.7778e-01           | 5.9796e-03 | 1.3742e-02 | 1.4979e-01 | 8.4233e-01 | 1.3097e-01 |
| <b>miR165</b>     | TCGGACCAGGCTTATCCCCC   | -2.5046 | -1.8148 | -3.5452 | -1.4919 | -0.1033 | -1.0848  | 1.2591e-05           | 7.3996e-04 | 7.9918e-11 | 1.7601e-02 | 8.9704e-01 | 1.7679e-02 |
| <b>miR166</b>     | TCTCGACCAGGCTTCTTCTT   | -1.0923 | -2.2965 | -1.8234 | -1.338  | 0.3396  | -0.4957  | 5.1378e-02           | 7.9540e-05 | 1.0250e-03 | 1.2990e-01 | 6.6802e-01 | 4.0374e-01 |
|                   | TCGGACCAGGCTTCTTCTT    | -0.9008 | -1.6627 | -1.4289 | -1.0861 | 1.3503  | -0.5577  | 1.5987e-01           | 1.9482e-03 | 7.4708e-03 | 1.8141e-01 | 4.1357e-02 | 4.6040e-01 |
|                   | TCGGACCAGGCTTCTTCTT    | -1.9851 | -2.6027 | -2.8878 | -1.4276 | 0.5737  | -0.7608  | 5.4438e-03           | 8.2747e-05 | 2.1889e-05 | 1.5702e-01 | 5.0725e-01 | 2.7078e-01 |
|                   | TCGGACCAGGCTTCTTCTT    | -3.0204 | -4.1476 | -4.5407 | -1.7399 | -0.6711 | -1.8535  | 1.7889e-03           | 5.8295e-06 | 3.0927e-06 | 1.4645e-01 | 5.0659e-01 | 1.4493e-02 |
|                   | GGAATGTTGCTGGCTCGAGG   | -0.711  | -1.7984 | -1.3272 | -1.3931 | -0.6927 | -2.6773  | 2.6192e-01           | 2.7567e-03 | 3.6347e-03 | 2.5117e-02 | 3.0634e-01 | 3.1045e-05 |
|                   | GGAATGTTGCTGGCTCGAGG   | 2.0451  | 0.8018  | 1.2374  | -1.1431 | 1.7732  | -0.8141  | 8.2930e-04           | 1.4876e-01 | 2.3876e-03 | 3.9974e-02 | 1.1164e-03 | 2.9697e-01 |
|                   | TCGGACCAGGCTTCTTCTT    | -2.394  | -3.4202 | -4.2816 | -2.0328 | 0.8623  | -1.3329  | 8.6259e-03           | 2.3242e-05 | 3.5414e-07 | 5.1726e-02 | 5.3454e-01 | 7.7105e-02 |
|                   | TCGGACCAGGCTTCTTCTT    | -2.3385 | -1.8393 | -2.7422 | -1.5734 | -0.2352 | -1.8484  | 1.1121e-04           | 2.7991e-03 | 5.4742e-06 | 6.9208e-02 | 7.9848e-01 | 9.4666e-04 |
|                   | TCTCGACCAGGCTTCTTCT    | -1.9712 | -1.9307 | -2.464  | -2.049  | -0.468  | -2.1563  | 3.5811e-04           | 6.2984e-04 | 4.4099e-07 | 7.7371e-04 | 5.2708e-01 | 8.3862e-05 |
|                   | TCGGACCAGGCTTCTTCTT    | -1.7827 | -1.8583 | -1.9044 | -1.3379 | 0.5517  | -1.399   | 1.1768e-04           | 7.6181e-04 | 7.7828e-06 | 2.2948e-02 | 4.0255e-01 | 2.2732e-02 |
|                   | TTGGACCAGGCTTCTTCTT    | -2.158  | -0.7143 | -2.1953 | -1.8471 | -0.5364 | -1.4471  | 9.9113e-04           | 2.6135e-01 | 4.7869e-04 | 4.4771e-02 | 5.0900e-01 | 1.2414e-02 |
|                   | TCGGACCAGGCTTCTTCTT    | -2.4631 | -1.8952 | -2.6746 | -1.6983 | -0.1267 | -2.1526  | 3.2691e-05           | 1.5336e-03 | 6.9229e-08 | 8.8493e-03 | 8.8197e-01 | 2.0980e-04 |
|                   | CCGGACCAGGCTTCTTCTT    | -2.152  | -2.0074 | -1.8662 | -1.5471 | -0.5691 | -1.7161  | 2.0379e-04           | 2.6984e-03 | 3.6635e-04 | 6.1754e-02 | 4.4463e-01 | 1.3886e-03 |
|                   | TCGGACCAGGCTTCTTCTT    | -3.7372 | -4.0326 | -4.5699 | -1.6204 | -0.763  | -1.5784  | 1.3800e-04           | 4.8881e-07 | 4.5937e-07 | 1.3251e-01 | 4.3777e-01 | 1.9755e-02 |
| <b>miR167</b>     | TGAAGTGCCAGCATGATCTT   | -3.9948 | -4.195  | -5.231  | -1.6767 | -1.5229 | -3.4517  | 5.6893e-07           | 8.7590e-10 | 2.2832e-11 | 6.7075e-02 | 6.4634e-02 | 1.0521e-08 |
|                   | TGAAGTGCCAGCATGATCT    | -2.8072 | -3.0585 | -3.6169 | -1.6885 | -0.918  | -2.5615  | 6.4784e-07           | 9.4814e-08 | 1.1900e-13 | 2.6319e-03 | 2.0075e-01 | 6.0377e-08 |
|                   | TGAAGTGCCAGCATGATCTG   | -2.9493 | -2.5831 | -3.1153 | -1.8973 | -0.9082 | -3.1083  | 2.9133e-07           | 2.3760e-06 | 4.3495e-11 | 7.9746e-04 | 1.9024e-01 | 3.2141e-09 |
|                   | TGAAGTGCCAAATGATCTG    | -4.8434 | -2.1491 | -3.097  | -1.6292 | -1.4076 | -3.9552  | 1.6305e-08           | 5.6475e-04 | 1.7500e-06 | 6.6807e-02 | 4.5607e-02 | 2.8436e-08 |
|                   | TGAAGTGCCAGCATGATCTC   | -3.9038 | -3.9578 | -4.2328 | -1.3346 | -1.5715 | -3.0239  | 1.9046e-09           | 2.5671e-10 | 1.8087e-11 | 6.8548e-02 | 3.3814e-02 | 1.1726e-07 |
|                   | TGAAGTGCCAGCATGATCTGC  | -5.405  | -4.806  | -3.9579 | -0.7351 | -1.384  | -4.9963  | 8.0132e-11           | 5.2892e-09 | 3.1324e-09 | 3.6809e-01 | 3.9154e-02 | 1.3593e-11 |
|                   | TGAAGTGCCAGCATGATCTTA  | -4.5238 | -4.3513 | -5.3904 | -2.3152 | -1.2676 | -4.021   | 1.5744e-07           | 3.6167e-07 | 2.9180e-09 | 1.2204e-02 | 9.1246e-02 | 1.2195e-07 |
|                   | TGAAGTGCCAGCATGATCTA   | -3.0073 | -3.4542 | -3.8585 | -2.05   | -1.0672 | -2.2014  | 9.5625e-06           | 1.2789e-08 | 1.9524e-10 | 5.8586e-03 | 1.6555e-01 | 1.9043e-04 |
|                   | TGAAGTGCCAGCATGATCTGA  | -1.0809 | -1.8255 | -1.9691 | -2.1163 | -0.6294 | -2.0037  | 2.4671e-02           | 3.9845e-04 | 3.3758e-05 | 1.6250e-03 | 3.3894e-01 | 8.4670e-05 |
| <b>miR168</b>     | CCGCTTGCATCAACTGAAT    | -1.3557 | -2.2231 | -1.8382 | -2.6997 | -1.2152 | -2.1407  | 1.0548e-02           | 3.2644e-06 | 7.4861e-05 | 1.1960e-07 | 4.3736e-02 | 1.7453e-06 |
|                   | TCGCTTGGTGCAGGTCGGGA   | -2.987  | -3.3383 | -4.569  | -3.4835 | -1.7745 | -4.58    | 4.7619e-08           | 2.1443e-08 | 3.7360e-15 | 1.2259e-08 | 3.8447e-03 | 5.0014e-14 |
|                   | TCGCTTGGTGCAGGTCGGGAA  | -2.8744 | -2.9726 | -3.7136 | -2.8867 | -2.3366 | -4.2159  | 4.9515e-05           | 3.8430e-04 | 1.4972e-13 | 2.5719e-07 | 1.3415e-04 | 2.2668e-14 |
| <b>miR169</b>     | TAGCCAAGATGACTTGCCTG   | -4.2493 | -4.1773 | -5.1841 | -1.888  | -0.5337 | -4.3615  | 1.3701e-16           | 5.5974e-16 | 2.9413e-21 | 2.1679e-04 | 4.8904e-01 | 2.9739e-17 |
|                   | TAGCCAAAATGACTTGCCTG   | -6.1281 | -4.3742 | -6.2001 | -2.1214 | -1.1149 | -3.6655  | 1.2764e-06           | 1.3360e-05 | 3.8223e-07 | 6.2966e-02 | 1.9652e-01 | 7.6949e-06 |
|                   | TAGCCAAAATGACTTGCCTGC  | -3.549  | -2.8145 | -4.3345 | -2.6415 | -0.7649 | -4.2364  | 1.7820e-10           | 1.1046e-07 | 3.8446e-15 | 8.7770e-06 | 2.8671e-01 | 1.1465e-13 |
| <b>miR171</b>     | TTGAGCCGGTCAATATCTCT   | -1.9169 | -1.7839 | -2.4849 | -0.2226 | -0.2185 | -0.4404  | 3.5785e-04           | 5.0602e-04 | 1.3463e-06 | 8.3217e-01 | 7.8618e-01 | 4.1106e-01 |
|                   | TTGAGCCGGTCAATATCAGG   | -1.142  | -2.003  | -1.3281 | -1.1313 | -1.7588 | -1.9372  | 1.3441e-02           | 7.0831e-05 | 1.5432e-03 | 5.4220e-02 | 7.7756e-03 | 6.0441e-05 |
|                   | TGATTGAGCCGGTCAATATC   | -0.6744 | -1.1545 | -1.275  | -0.4085 | 0.1328  | -2.1555  | 2.3241e-01           | 2.0392e-02 | 4.9412e-03 | 6.8551e-01 | 8.8720e-01 | 1.0763e-04 |
|                   | TGATTGAGCCGGTCAATATC   | -0.8831 | -0.6767 | -1.2926 | -0.8337 | 0.0443  | -1.6657  | 1.0018e-01           | 2.1671e-01 | 1.2757e-02 | 3.6710e-01 | 9.6579e-01 | 2.5317e-03 |
| <b>miR172</b>     | AGAATCTTGATGATGCTGCAT  | -4.1941 | -4.2106 | -5.2701 | -1.017  | -1.307  | -4.0598  | 6.8329e-12           | 1.6300e-15 | 4.0517e-22 | 1.1363e-01 | 4.6252e-02 | 1.1957e-15 |
| <b>miR319</b>     | TTGGACTGAAGGGAGCTCTT   | -3.6438 |         |         |         |         |          |                      |            |            |            |            |            |

**Table S3a: Statically analysis of sRNAs-reads profiles in control and stresses exposed plants.** The differences between treatment and reads-length were analyzed by the Scheirer–Ray–Hare non-parametric test (upper). Once established that only length category shown significant alterations we used Dunn’s Multiple Comparison Test to analyze the difference between 24 nt length reads and the rest of the read-size categories (lower).

| Categories    | Df | Sum Sq | H      | <i>p</i> .value |
|---------------|----|--------|--------|-----------------|
| Stress        | 6  | 3808   | 2.603  | 0.85676         |
| Length        | 5  | 144878 | 99.028 | < 1.0E-5        |
| Stress:Length | 30 | 35813  | 24.479 | 0.74993         |

| Size Comparison | Z      | <i>p</i> .unadj | <i>p</i> .adj |
|-----------------|--------|-----------------|---------------|
| 20 - 24         | -8,994 | 2,38E-19        | 3,57E-18      |
| 21 - 24         | -3,323 | 8,92E-04        | 1,34E-02      |
| 22 - 24         | -4,316 | 1,59E-05        | 2,38E-04      |
| 23 - 24         | -4,643 | 3,43E-06        | 5,15E-05      |
| 25 - 24         | 7,339  | 2,15E-13        | 3,23E-12      |

**Table S4:**

Presence and absence of stress-responsive miRNAs to a combined stress conditions in *Cucumis melo*.

1: stress-responsive, 0: non stress-responsive.

| <b>Family</b>  | <b>C-D</b> | <b>C-Sal</b> | <b>C-SD</b> | <b>D-Mon</b> | <b>D-Sal</b> | <b>C-Sal-SD</b> | <b>Total</b> |
|----------------|------------|--------------|-------------|--------------|--------------|-----------------|--------------|
| <b>miR156</b>  | 1          | 1            | 1           | 1            | 1            | 1               | 6            |
| <b>miR157</b>  | 1          | 1            | 1           | 1            | 1            | 1               | 6            |
| <b>miR159</b>  | 1          | 1            | 1           | 1            | 1            | 1               | 6            |
| <b>miR166</b>  | 1          | 1            | 1           | 1            | 1            | 1               | 6            |
| <b>miR167</b>  | 1          | 1            | 1           | 1            | 1            | 1               | 6            |
| <b>miR168</b>  | 1          | 1            | 1           | 1            | 1            | 1               | 6            |
| <b>miR319</b>  | 1          | 1            | 1           | 1            | 1            | 1               | 6            |
| <b>miR396</b>  | 1          | 1            | 1           | 1            | 1            | 1               | 6            |
| <b>miR398</b>  | 1          | 1            | 1           | 1            | 1            | 1               | 6            |
| <b>miR408</b>  | 1          | 1            | 1           | 1            | 1            | 1               | 6            |
| <b>miR160</b>  | 1          | 1            | 1           | 1            | 1            | 0               | 5            |
| <b>miR169</b>  | 1          | 1            | 1           | 1            | 0            | 1               | 5            |
| <b>miR171</b>  | 1          | 1            | 1           | 0            | 1            | 1               | 5            |
| <b>miR393</b>  | 1          | 1            | 1           | 0            | 1            | 1               | 5            |
| <b>miR1515</b> | 1          | 1            | 1           | 0            | 0            | 1               | 4            |
| <b>miR164</b>  | 1          | 1            | 1           | 0            | 0            | 1               | 4            |
| <b>miR172</b>  | 1          | 1            | 1           | 0            | 0            | 1               | 4            |
| <b>miR165</b>  | 1          | 1            | 1           | 0            | 0            | 0               | 3            |
| <b>miR394</b>  | 1          | 0            | 1           | 0            | 0            | 1               | 3            |
| <b>miR397</b>  | 0          | 1            | 0           | 1            | 0            | 1               | 3            |
| <b>miR162</b>  | 1          | 0            | 1           | 0            | 0            | 0               | 2            |
| <b>miR395</b>  | 0          | 0            | 0           | 0            | 1            | 0               | 1            |
| <b>Total</b>   | 20         | 19           | 20          | 13           | 14           | 18              | 104          |



| target-miRNA<br>module | stress | miRNA Target |       |
|------------------------|--------|--------------|-------|
|                        |        | IFC          | IFC   |
| miR156-SPL9            | C/D    | -2,35        | 3,41  |
|                        | C/SA   | -1,64        | 2,12  |
|                        | C/SD   | -2,55        | 3,20  |
|                        | D/SA   | 1,47         | 1,22  |
|                        | D/MON  | -1,88        | 1,67  |
| C/SA/SD                | -2,41  | 2,62         |       |
| miR159-REF4            | C/D    | -2,15        | 2,97  |
|                        | C/SA   | -2,25        | 4,01  |
|                        | C/SD   | -2,47        | 3,50  |
|                        | D/SA   | -1,28        | 3,43  |
|                        | D/MON  | -1,67        | 1,69  |
| C/SA/SD                | -2,28  | 2,16         |       |
| miR160-ARF17           | C/D    | -1,63        | 2,16  |
|                        | C/SA   | -2,69        | 1,82  |
|                        | C/SD   | -2,67        | 0,38  |
|                        | D/SA   | -1,57        | 1,34  |
|                        | D/MON  | -2,72        | 0,05  |
| C/SA/SD                | -2,73  | 0,95         |       |
| miR164-NAC             | C/D    | -4,05        | -0,79 |
|                        | C/SA   | -3,10        | 1,57  |
|                        | C/SD   | -2,46        | 5,26  |
|                        | D/SA   | -1,90        | 6,75  |
|                        | D/MON  | -2,67        | 6,35  |
| C/SA/SD                | -1,77  | 2,70         |       |
| miR166-ATHB14          | C/D    | -1,70        | 6,51  |
|                        | C/SA   | -2,15        | 5,24  |
|                        | C/SD   | -2,95        | 1,59  |
|                        | D/SA   | -2,58        | 1,57  |
|                        | D/MON  | -3,12        | 1,54  |
| C/SA/SD                | -1,57  | -0,50        |       |
| miR167-ARF6            | C/D    | -1,90        | 1,51  |
|                        | C/SA   | -3,11        | 1,50  |
|                        | C/SD   | -4,25        | 1,44  |
|                        | D/SA   | -4,18        | 2,07  |
|                        | D/MON  | -5,18        | 1,27  |
| C/SA/SD                | -1,89  | 1,87         |       |
| miR169-NFY             | C/D    | -4,36        | 1,64  |
|                        | C/SA   | -1,92        | 3,67  |
|                        | C/SD   | -2,00        | 4,52  |
|                        | D/SA   | -2,48        | 3,81  |
|                        | D/MON  | -1,76        | 1,66  |
| C/SA/SD                | -1,94  | 3,49         |       |
| miR171-SCL6            | C/D    | -4,19        | 2,64  |
|                        | C/SA   | -4,21        | 4,08  |
|                        | C/SD   | -5,27        | 3,50  |
|                        | D/SA   | -4,06        | 3,95  |
|                        | D/MON  | -4,35        | 3,06  |
| C/SA/SD                | -4,49  | 3,03         |       |
| miR172-AP2             | C/D    | -4,05        | 2,96  |
|                        | C/SA   | -1,76        | 0,60  |
|                        | C/SD   | -2,09        | 1,40  |
|                        | D/SA   | -3,81        | 2,96  |
|                        | D/MON  | -6,16        | 0,91  |
| C/SA/SD                | -8,37  | 1,54         |       |
| miR319-TCP2            | C/D    | -7,02        | 1,04  |
|                        | C/SA   | -2,78        | 2,71  |
|                        | C/SD   | -3,39        | 3,18  |
|                        | D/SA   | -2,83        | 2,96  |
|                        | D/MON  | -2,38        | 0,32  |
| C/SA/SD                | -1,49  | 1,30         |       |
| miR393-AFB2            | C/D    | -2,71        | 2,98  |
|                        | C/SA   | 6,14         | 2,06  |
|                        | C/SD   | 9,26         | 0,53  |
|                        | D/SA   | 5,21         | 2,19  |
|                        | D/MON  | 8,21         | -0,32 |
| C/SA/SD                | 9,83   | -0,51        |       |
| miR396-GRF9            | C/D    | 5,86         | 0,51  |
|                        | C/SA   | 5,11         | 1,33  |
|                        | C/SD   | 8,99         | -0,03 |
|                        | D/SA   | 9,35         | -0,82 |
|                        | D/MON  | 8,21         | -0,38 |
| C/SA/SD                | 9,83   | -1,15        |       |
| miR397-HSP             | C/D    | 5,86         | 0,19  |
|                        | C/SA   | 5,11         | 0,20  |
|                        | C/SD   | 8,99         | -0,83 |
|                        | D/SA   | 9,35         | -0,61 |
|                        | D/MON  | 2,58         | -2,16 |
| C/SA/SD                | 4,66   | -2,60        |       |
| miR398-CUP             | C/D    | 3,95         | -2,17 |
|                        | C/SA   | 2,38         | 1,24  |
|                        | C/SD   | 4,14         | -1,19 |
|                        | D/SA   | 3,92         | 1,75  |
|                        | D/MON  | 3,92         | 1,75  |
| C/SA/SD                | 3,92   | 1,75         |       |

bioRxiv preprint doi: <https://doi.org/10.1101/2021.07.30.454429>; this version posted July 31, 2021. The copyright holder for this preprint (which was not certified by peer review) is the author/funder, who has granted bioRxiv a license to display the preprint in perpetuity. It is made available under aCC-BY-NC-ND 4.0 International license.

Table S6B:

Log10(SCE + 1) values of stress-responsive miRNAs in Cucumis melo.

| Family  | sRNA                   | C-D     | C-Sal   | C-SD    | D-Mon   | D-Sal   | C-Sal-SD |
|---------|------------------------|---------|---------|---------|---------|---------|----------|
| miR1515 | TCATTTTTCGCTGCAATGATCC | 0.205   | -0.5775 | 0.4546  | -0.7541 | -0.6381 | -0.79    |
| miR156  | GCTCACTTCTCTTTCTGTCAGC | 0.0829  | -0.3162 | -0.2046 | -0.5491 | -0.622  | -0.6858  |
|         | TGACAGAAGAGAGTGAGCACA  | 0.9932  | -0.9311 | 0.6012  | -0.4497 | -0.9554 | -1.3785  |
|         | TGACAGAAGAGAGTGAGCACT  | 0.856   | -0.9707 | 0.7265  | -0.7899 | -1.1356 | -1.4622  |
|         | TGCTCACTTCTCTTTCTGTCAG | 2.2955  | -1.4007 | 1.5016  | 2.0962  | 1.7082  | -2.5608  |
|         | TTGACAGAAGAGAGTGAGCAC  | 2.1891  | -2.6423 | 1.1456  | -2.1953 | -2.5281 | -3.0071  |
|         | TTGACAGAAGATAGAGAGCAC  | 1.4373  | -1.7235 | 0.2556  | -1.3264 | -1.6538 | -2.0545  |
|         | TTGACAGAAGATAGAGGGCAC  | -0.8374 | -1.4539 | -0.7914 | -0.9082 | -0.9924 | -1.6467  |
| miR157  | GCTCTTATACTTCTGTCCACC  | 0.9692  | -1.1521 | -1.3609 | 1.2435  | -0.5613 | -1.7005  |
|         | GCTCTTATGCTTCTGTCCATC  | 2.8414  | 2.6475  | 2.4262  | 2.8407  | 2.6665  | -1.966   |
|         | GCTCTTATGCTTCTGTCCATCA | 1.6437  | 1.3138  | -0.8241 | 1.5289  | 1.3492  | -1.5833  |
| miR159  | AGCTGCTAAGCTATGGATCCC  | 0.547   | -0.4997 | 0.3673  | 0.1305  | -0.0939 | -0.652   |
|         | GAGCTCCTTGAAGTCCAATAG  | 0.6604  | -0.5027 | -0.9771 | 0.4558  | -0.2673 | -1.3769  |
|         | TTTGATTGAAGGGAGCTCCT   | -0.0334 | -0.5602 | 0.2852  | -0.1555 | -0.6839 | -0.66    |
|         | TTTGATTGAAGGGAGCTCTC   | -0.9226 | -1.3389 | 0.6968  | -1.2269 | -1.1464 | -1.4662  |
|         | TTTGATTGAAGGGAGCTCTG   | 0.0085  | -1.4011 | -0.6886 | -1.3266 | 1.911   | -1.5097  |
|         | TTTGATTGAAGGGAGCTCTT   | -1.4546 | -1.9506 | 1.3783  | -1.9287 | -1.5142 | -2.1776  |
| miR160  | TGCCTGGCTCCCTGTATGCCA  | 1.4254  | 0.5763  | -1.1352 | 0.7522  | -1.4112 | -1.5688  |
| miR162  | TCGATAAGCCTTGCATCCAG   | -0.7613 | -0.7768 | 0.2137  | -0.7026 | -0.039  | -0.9202  |
|         | TTGATAAACCTTGCATCCAG   | 0.2356  | -0.5735 | 0.4711  | -0.2702 | -0.0318 | -0.7952  |
| miR164  | TGGAGAAGCAGGGCACGTGCA  | 0.6826  | -0.8174 | -0.4465 | -0.6793 | -0.677  | -1.0665  |
|         | TGGAGAAGCAGGGCACGTGCT  | -0.9737 | -1.1474 | 0.4214  | -1.2283 | -1.462  | -1.3768  |
| miR165  | TCGGACCAGGCTTCAATCCCC  | -0.296  | -1.1319 | 0.31    | -1.1089 | -1.1324 | -1.2174  |
| miR166  | CCGGACCAGGCTTCAATCCCC  | 0.1345  | -0.8522 | 0.5157  | -0.8992 | -0.8886 | -1.0415  |
|         | GGAATGTTGGCTGGCTCGAGG  | 1.8061  | -1.9876 | -0.9263 | -1.6505 | -1.3736 | -2.2517  |
|         | GGAATGTTGTCTGGCTCGAGG  | 1.7935  | -2.0966 | -1.056  | -1.8381 | -2.0101 | -2.3977  |
|         | TCGGACCAGGCTTCAATCCCC  | 1.7759  | -3.4511 | 2.6882  | -3.4721 | -3.4195 | -3.6796  |
|         | TCGGACCAGGCTTCAATCCCC  | 0.6952  | -1.4369 | 1.4086  | -1.2601 | -1.5238 | -1.3379  |
|         | TCGGACCAGGCTTCAATCCCCT | 1.8536  | -2.4579 | 2.4163  | -2.0164 | -2.4177 | -2.3491  |
|         | TCGGACCAGGCTTCAATCCCG  | -1.0515 | -1.2472 | 0.9904  | -1.639  | 0.8597  | -0.9963  |
|         | TCGGACCAGGCTTCAATCCCT  | -2.6359 | -3.1931 | 2.3874  | -3.1117 | -3.1234 | -3.1315  |
|         | TCGGACCAGGCTTCAATCCTC  | -0.5458 | -0.8649 | -0.2474 | -0.978  | -0.9974 | -1.0853  |
|         | TCTCGACCAGGCTTCAATCC   | 1.8999  | -2.2848 | -0.5772 | -2.2991 | -2.1836 | -2.6313  |
|         | TCTCGACCAGGCTTCAATCT   | -1.3555 | -2.0793 | 1.1213  | -1.9835 | -1.9444 | -2.0008  |
|         | TTGGACCAGGCTTCAATCCCC  | 0.3075  | 0.3428  | 0.42    | -0.6439 | -0.4393 | -0.5037  |
| miR167  | TGAAGCTGCCAACATGATCTG  | 0.1039  | -0.1901 | 0.1852  | -0.4533 | -0.3785 | -0.598   |
|         | TGAAGCTGCCAGCATGATCTA  | 1.8078  | -2.4246 | 2.1449  | -1.8587 | -2.4274 | -2.4603  |
|         | TGAAGCTGCCAGCATGATCTC  | 0.4004  | -1.2635 | 1.1037  | -1.0892 | -1.4278 | -1.3517  |
|         | TGAAGCTGCCAGCATGATCTG  | 2.9393  | -3.3545 | 3.0106  | -3.2857 | -3.3652 | -3.6118  |
|         | TGAAGCTGCCAGCATGATCTGA | 0.0871  | -0.7048 | 0.3552  | -0.9288 | -0.7209 | -0.8748  |
|         | TGAAGCTGCCAGCATGATCTGC | -0.0653 | -0.6987 | 0.3939  | -0.6173 | -0.8166 | -0.829   |
|         | TGAAGCTGCCAGCATGATCTT  | 1.0557  | -1.7963 | 1.6886  | -1.4518 | -1.968  | -1.9198  |
|         | TGAAGCTGCCAGCATGATCTTA | -0.2589 | -0.7729 | 0.4087  | -0.7222 | -0.8964 | -0.8683  |
| miR168  | CCCGCTTGCATCAACTGAAT   | 2.1358  | -1.8696 | 1.7239  | 1.1692  | 1.1938  | -2.2298  |
|         | TCGCTTGGTGCAGGTCGGGAA  | 2.2302  | -0.904  | 1.9011  | 1.8964  | -0.9668 | -2.1238  |
| miR169  | TAGCCAAAATGACTGCCTG    | 0.45    | -0.8258 | 0.45    | 0.0288  | -0.7344 | -0.8105  |
|         | TAGCCAAAATGACTGCCTGC   | 0.715   | -1.3313 | 0.6278  | -0.9566 | -1.3059 | -1.4487  |
|         | TAGCCAAAGTACTGCCTG     | 0.47    | -0.8588 | 0.5322  | -1.0592 | -0.8824 | -1.2212  |
|         | TGATTGAGCCGTCGAATATC   | -0.667  | -1.112  | -0.5161 | -1.2123 | -1.239  | -1.4447  |
|         | TGATTGAGCCGTCGAATATC   | 0.4273  | -0.5566 | -0.6952 | -0.7    | -0.534  | -1.1871  |
|         | TTGAGCCGTCGAATATCTCT   | -0.4265 | -0.8882 | 0.2802  | -0.535  | -0.9628 | -0.865   |
|         | TTGAGCCGTCGAATATCACG   | 0.3336  | -0.995  | 0.2087  | -1.2716 | -1.3224 | -1.556   |
| miR172  | AGAATCTTGATGATGCTGCAT  | 0.931   | -0.4473 | -1.311  | -0.2753 | -0.4512 | -1.641   |
| miR319  | AACTGCCGACTCATTCACTCA  | 0.991   | -1.1321 | 1.3643  | -0.5028 | 0.3612  | -1.3234  |
|         | AGCTGCCGACTCATTCACTCA  | 0.4746  | -0.4442 | 0.7579  | -0.2195 | 0.6453  | -0.5187  |
|         | CTTGACTGAAGGGAGCTCCC   | 0.8094  | 0.1356  | -0.2261 | 0.2183  | -0.1413 | -0.8651  |
|         | TTGGACTGAAGGGAGCTCCCA  | 0.9825  | 0.4082  | 0.8014  | 0.7648  | 0.578   | -0.5567  |
|         | TTGGACTGAAGGGAGCTCCCT  | 2.0399  | 1.2766  | 1.5234  | 1.0002  | 1.3769  | -2.119   |
|         | TTGGACTGAAGGGAGCTCCTC  | 0.3422  | -0.073  | -0.0672 | -0.1475 | 0.5444  | -0.4171  |
| miR393  | TCCAAAGGGATCGCATTGATC  | 0.3709  | -0.2638 | -0.6522 | -0.3379 | -0.9032 | -1.1661  |
| miR395  | TGAAGTGTGGGGAACTCT     | 0.4485  | -0.6927 | -0.1711 | 0.2736  | 0.6788  | -0.7418  |
| miR396  | GCTCAAGAAAGCTGTGGGAAA  | 0.7803  | -0.3349 | -0.6452 | 0.4826  | -0.5847 | -1.1031  |
|         | GTTCAATAAAGCTGTGGGAAA  | 1.1695  | -0.1022 | 1.0304  | 1.1126  | 0.5173  | -0.9273  |
|         | GTTCAATAAAGCTGTGGGAAG  | 2.511   | 1.7002  | 2.1458  | 2.1873  | 2.0012  | -2.3082  |
|         | TTCCACAGCTTTCTTGAACGT  | 0.7188  | 0.496   | 0.6126  | 0.6516  | -0.323  | -0.3943  |
|         | TTCCACAGCTTTCTTGAACCTA | 2.1384  | 1.4162  | 2.1265  | 2.1764  | 1.5871  | -1.6342  |
|         | TTCCACAGCTTTCTTGAACCTG | 2.8058  | -1.3804 | 2.6742  | 1.5958  | 1.9194  | -2.8109  |
|         | TTCCACAGCTTTCTTGAACCTT | 3.5025  | 3.1677  | 3.1526  | 3.4072  | 3.3923  | -3.6048  |
|         | TTCCACGGCTTTCTTGAACCTG | -1.9932 | -1.992  | -1.707  | -1.5926 | 1.8041  | -2.5032  |
|         | TTCCACGGCTTTCTTGAACCTT | 1.0057  | 0.6049  | 0.6131  | 1.1164  | 1.2166  | -1.0678  |
| miR397  | TCATTGAGTGAGCGTTGATG   | -1.1728 | 0.3905  | 0       | -1.0048 | -1.1728 | 0        |
| miR398  | CGTGTCTCAGGTCGCCCTG    | -0.9672 | 1.2052  | -0.6492 | -0.6467 | -1.0143 | 1.2303   |
|         | TATGTTCTCAGGTCGCCCTG   | -0.1284 | 1.0873  | -0.5448 | -0.2717 | -0.5399 | 0.8997   |
|         | TGTGTTCCAGGTCGCCCTG    | -0.9798 | 1.2463  | -0.6256 | -0.6607 | -0.9816 | 1.1638   |
|         | TGTGTTCTCAGGTCACCCCTG  | -0.4704 | 1.1877  | -0.7261 | -0.4834 | -0.7611 | 1.0627   |
|         | TGTGTTCTCAGGTCACCCCTT  | 0.9448  | -0.9462 | -0.8554 | 0.16    | -0.5903 | -0.7453  |
|         | TGTGTTCTCAGGTCGCCCCG   | -1.5124 | 1.3931  | -1.2382 | -1.2769 | -1.4087 | 1.5699   |
|         | TGTGTTCTCAGGTCGCCCTG   | -3.4215 | 3.6181  | -2.976  | -3.1014 | -3.4686 | 3.4992   |
|         | TTGTGTTCTCAGGTCACCCCT  | 1.0342  | -0.7886 | -0.2349 | -4e-04  | -0.5018 | -0.6007  |
| miR408  | ATGCACTGCCTCTCCCTGGC   | -3.2175 | 2.8169  | -1.7641 | -3.1514 | -3.21   | 2.6228   |
|         | TGCACTGCCTCTCCCTGGCT   | -1.204  | 0.456   | 0       | -1.0953 | -1.1574 | 0.364    |
|         | TGCACTGCCTCTCCCTGGCTG  | -1.429  | 0.9566  | -0.2599 | -1.3372 | -1.4417 | 0.6225   |

Note:

\* Red: The SCE is Non-Significant.

† Black: The SCE is Significant.

bioRxiv preprint doi: <https://doi.org/10.1101/2021.07.30.454429>; this version posted July 31, 2021. The copyright holder for this preprint (which was not certified by peer review) is the author/funder, who has granted bioRxiv a license to display the preprint in perpetuity. It is made available under aCC-BY-NC-ND 4.0 International license.

**Table S7:** Detail of the percentage of additive and non-additive values SCE values obtained for differentially expressed miRNAs in each analyzed stress combination.

|                    | Stress combination effects |             |             |             |                |             |
|--------------------|----------------------------|-------------|-------------|-------------|----------------|-------------|
|                    | unique reads               |             | total reads |             | miRNA families |             |
|                    | Additive                   | No Additive | Additive    | No Additive | Additive       | No Additive |
| C-D                | 75,9                       | 24,1        | 37,27       | 62,73       | 59,09          | 40,91       |
| C-Sal              | 62,65                      | 37,35       | 45,73       | 54,28       | 36,36          | 63,64       |
| C-SD               | 85,54                      | 14,46       | 92,24       | 7,77        | 59,09          | 40,91       |
| D-Mon              | 63,86                      | 36,14       | 63,01       | 36,99       | 36,36          | 63,64       |
| D-Sal              | 65,06                      | 34,94       | 54,26       | 45,74       | 40,91          | 59,09       |
| C-Sal-SD           | 38,55                      | 61,45       | 7,95        | 92,05       | 22,73          | 77,27       |
| Mean in all stress | 65,26                      | 34,74       | 50,08       | 49,93       | 42,42          | 57,58       |

**Table S7:**

Presence and absence of Stress Combination Effect (SCE) for stress-responsive miRNAs in Cucumis melo.

1: non-additive SCE, 0: additive SCE.

| <b>Family</b>  | <b>C-D</b> | <b>C-Sal</b> | <b>C-SD</b> | <b>D-Mon</b> | <b>D-Sal</b> | <b>C-Sal-SD</b> | <b>Total</b> |
|----------------|------------|--------------|-------------|--------------|--------------|-----------------|--------------|
| <b>miR156</b>  | 1          | 1            | 1           | 1            | 1            | 1               | 6            |
| <b>miR157</b>  | 1          | 1            | 1           | 1            | 1            | 1               | 6            |
| <b>miR319</b>  | 1          | 1            | 1           | 1            | 1            | 1               | 6            |
| <b>miR396</b>  | 1          | 1            | 1           | 1            | 1            | 1               | 6            |
| <b>miR398</b>  | 1          | 1            | 1           | 1            | 1            | 1               | 6            |
| <b>miR159</b>  | 0          | 1            | 1           | 1            | 1            | 1               | 5            |
| <b>miR166</b>  | 1          | 1            | 0           | 1            | 1            | 1               | 5            |
| <b>miR167</b>  | 0          | 1            | 1           | 1            | 1            | 1               | 5            |
| <b>miR408</b>  | 1          | 0            | 1           | 1            | 1            | 1               | 5            |
| <b>miR171</b>  | 0          | 1            | 0           | 1            | 1            | 1               | 4            |
| <b>miR164</b>  | 0          | 1            | 0           | 1            | 1            | 1               | 4            |
| <b>miR165</b>  | 0          | 1            | 0           | 1            | 1            | 1               | 4            |
| <b>miR168</b>  | 1          | 1            | 0           | 0            | 0            | 1               | 3            |
| <b>miR169</b>  | 0          | 1            | 1           | 0            | 1            | 0               | 3            |
| <b>miR172</b>  | 1          | 0            | 0           | 0            | 0            | 1               | 2            |
| <b>miR395</b>  | 0          | 1            | 0           | 0            | 0            | 1               | 2            |
| <b>miR1515</b> | 0          | 0            | 0           | 0            | 1            | 1               | 2            |
| <b>miR393</b>  | 0          | 0            | 0           | 1            | 0            | 0               | 1            |
| <b>miR162</b>  | 0          | 0            | 0           | 0            | 0            | 1               | 1            |
| <b>miR397</b>  | 0          | 0            | 0           | 0            | 0            | 0               | 0            |
| <b>miR160</b>  | 0          | 0            | 0           | 0            | 0            | 0               | 0            |
| <b>miR394</b>  | 0          | 0            | 0           | 0            | 0            | 0               | 0            |
| <b>Total</b>   | 9          | 14           | 9           | 13           | 14           | 17              | 76           |
